# Supplementary material for: Tunable porosity of 3D-networks with germanium nodes
Source: Royal Society of Chemistry journal article supplement (doi:10.1039/c5cc06790a), 2015-10-28
Supplement: c5cc06790a1.pdf [file c5cc06790a1.pdf]

## Supporting Information

### Tunable porosity of 3D-networks with germanium nodes

Laure Monnereau,<sup>a</sup> Thierry Muller,<sup>b</sup> Mathias Lang<sup>a</sup> and Stefan Bräse<sup>a,c\*</sup>

Email: [braese@kit.edu](mailto:braese@kit.edu)

---

- a) Karlsruhe Institute of Technology (KIT), Institute of Organic Chemistry, Fritz-Haber Weg 6, 76131 Karlsruhe, Germany. E-mail: [braese@kit.edu](mailto:braese@kit.edu); Tel: +49-721-608-48581
- b) Clariant Produkte (Deutschland) GmbH, Clariant Innovation Center, Group Technology & Innovation, Group Chemical Research, Competence Center Colorants & Functional Chemicals, Industriepark Höchst, 65296 Frankfurt, Germany
- c) Institute of Toxicology and Genetics, Hermann-von-Helmholtz-Platz 1, D-76344 Eggenstein-Leopoldshafen, Germany.

## Table of content

|                                                                        |     |
|------------------------------------------------------------------------|-----|
| I - General remarks                                                    | S3  |
| II - Experimental protocol                                             | S4  |
| II - 1) General procedure for the synthesis of <b>2</b> and <b>3</b>   | S4  |
| II - 2) General procedure for the synthesis of <b>9-14</b>             | S4  |
| II - 3) General procedure for the synthesis of <b>15</b>               | S5  |
| II - 4) General procedure for the synthesis of <b>16</b>               | S6  |
| II - 5) General procedure for the synthesis of <b>17</b>               | S6  |
| II - 6) General procedure for the synthesis of <b>18</b> and <b>19</b> | S7  |
| ➤ II - 6 - Route a) with ICl                                           | S7  |
| ➤ II - 6 - Route b) with TfOH                                          | S7  |
| • II - 6 - b - 1) with a model compound - <a href="#">1H NMR</a>       | S7  |
| • II - 6 - b - 2) with POPs <b>15</b> and <b>16</b>                    | S8  |
| ➤ II - 6 - Route c) with AcOH                                          | S9  |
| III - NMR of <b>2</b> and <b>3</b>                                     | S10 |
| IV - IR Spectra                                                        | S12 |
| V - DSC thermograms of <b>9-19</b>                                     | S13 |
| VI - TGA thermograms of <b>9-19</b>                                    | S17 |
| VII - Adsorption data of <b>9-19</b>                                   | S24 |
| VIII - SEM picture of <b>15</b>                                        | S32 |
| IX - References                                                        | S32 |

| Monomer                        |                         | Linker                                                                                   | HCPs                |                            |                     |
|--------------------------------|-------------------------|------------------------------------------------------------------------------------------|---------------------|----------------------------|---------------------|
| <b>3</b>                       |                         | 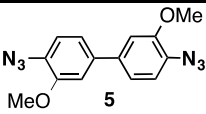<br>5 | <b>9</b>            |                            |                     |
| <a href="#">1H NMR</a>         | <a href="#">13C NMR</a> |                                                                                          | <a href="#">DSC</a> | <a href="#">TGA</a>        |                     |
| <b>3</b>                       |                         | <br>6 | <b>10</b>           |                            |                     |
|                                |                         |                                                                                          | <a href="#">DSC</a> | <a href="#">TGA</a>        |                     |
| <b>4</b>                       |                         |                                                                                          | <b>12</b>           |                            |                     |
|                                |                         |                                                                                          | <a href="#">DSC</a> | <a href="#">TGA</a>        |                     |
| <b>3</b>                       |                         | <br>7 | <b>13</b>           |                            |                     |
|                                |                         |                                                                                          | <a href="#">DSC</a> | <a href="#">TGA</a>        |                     |
| <b>4</b>                       |                         |                                                                                          | <b>14</b>           |                            |                     |
|                                |                         |                                                                                          | <a href="#">DSC</a> | <a href="#">TGA</a>        |                     |
| <b>3</b>                       |                         | <br>8 | <b>15</b>           |                            |                     |
|                                |                         |                                                                                          | <a href="#">DSC</a> | <a href="#">TGA</a>        | <a href="#">IR</a>  |
| <b>4</b>                       |                         |                                                                                          | <b>16</b>           |                            |                     |
|                                |                         |                                                                                          | <a href="#">DSC</a> | <a href="#">TGA</a>        | <a href="#">IR</a>  |
| <b>Post-fonctionnalisation</b> |                         |                                                                                          |                     |                            |                     |
| POP                            |                         | <i>Route a / with ICl</i>                                                                |                     | <i>Route b / with TfOH</i> |                     |
| <b>15</b>                      |                         | <b>18-ICl</b>                                                                            | <a href="#">TGA</a> | <b>18-TfOH</b>             | <a href="#">TGA</a> |
| <b>16</b>                      |                         | /                                                                                        |                     | <b>19-TfOH</b>             | <a href="#">TGA</a> |

## General Remarks

**NMR.** NMR spectra were recorded on a *Bruker AM 300* (300 MHz) as solutions in  $\text{CDCl}_3$ . Chemical shifts are expressed in parts per million (ppm,  $\delta$ ) downfield from tetramethylsilane (TMS) and are referenced to  $\text{CHCl}_3$  (7.26 ppm), as internal standard. The spectra were analyzed according to first order.

The solid-state NMR spectra were measured on a *Bruker Avance 400* spectrometer operating at 100.6 MHz for  $^{13}\text{C}$  NMR. The  $^{13}\text{C}$  CP/MAS (Cross-Polarization with Magic Angle Spinning) experiments were carried out at MAS rates of 14 kHz using densely packed powders of the compounds in 4 mm  $\text{ZrO}_2$  rotors. The  $^1\text{H}$   $\text{H}/2$  pulse was 4 ms and decoupling was used during the acquisition. The Hartmann-Hahn condition was optimized with adamantane at a rotational speed of 5 kHz. All spectra were measured using a contact time of 1.5 ms and a relaxation delay of 10.0 s, and 6000 FIDs were accumulated.

**ATR.** IR spectra were recorded with a *FT-IR Bruker IFS 88* spectrometer with OPUS software using the attenuated total reflection technique (ATR). The deposit of the absorption band was given in wave numbers  $\nu$  in  $\text{cm}^{-1}$ . The forms and intensities of the bands were characterized as follows: vs = very strong 0-10% T, s = strong 11-40% T, m = medium 41-70% T, w = weak 71-90% T, vw = very weak, 91-100% T, br = broad.

**MS.** MS (EI) (electron impact mass spectrometry) was performed by using a *Finnigan MAT 90* (70 eV).

**Elemental analysis.** The EA measurements were performed on an *Elementar vario MICRO* device using a Sartorius M2P precision balance. The following abbreviations were used: calc. = calculated data, found = measured data.

**Scanning Electronic Microscopy.** Microstructure of **15** was observed by scanning the polymer microsphere using the field-emission SEM (Zeiss Supra S5) at an accelerating voltage of 15 kV. The polymer was sputter-coated with a thin layer of gold (30 nm) before the measurement.

**Thermal properties.** The dynamic differential scanning calorimetry (DSC) was measured on a *METTLER Toledo dsc 30*, in a sealed aluminium 40  $\mu\text{L}$  pan under argon atmosphere. The obtained data were analyzed electronically with the software program STAR  $^{\circ}\text{SW}$  8.10 and plotted in a diagram. The enthalpy changing  $\Delta H$  [mW] was plotted against the temperature ( $-50^\circ\text{C}$  to  $250^\circ\text{C}$ ) with a heating rate of  $10^\circ\text{C}/\text{min}$ .

Thermogravimetric analyses (TGA) were performed under  $\text{N}_2$  on a Shimadzu TGA-50 Thermogravimetric Analyser, with a heat rate of  $10^\circ\text{C}\cdot\text{min}^{-1}$ .

**$\text{N}_2$  adsorption.** Gas adsorption isotherms were measured volumetrically using a surface analyser ThermoScientific Surfer Gas adsorption Porosimeter. A liquid nitrogen bath (77K) was used and the  $\text{N}_2$  gas used was UHP grade. For measurement of the specific surface areas ( $S_{\text{BET}}$ ,  $\text{m}^2\cdot\text{g}^{-1}$ ) the BET method was applied. For all isotherms plots, closed circles are used for adsorption data points and open circles are used to indicate desorption data points.

**Synthesis.** Solvents, reagents and chemicals were purchased from Sigma-Aldrich, ABCR and Acros Organics. All solvents, reagents and chemicals were used as purchased unless stated otherwise.

Tetrakis(4-bromophenyl)germanium **1**,<sup>[1]</sup> tetrakis(4-ethynylphenyl)methane **4**,<sup>[2]</sup> 4,4'-diazido-3,3'-bismethoxybiphenyl **5**,<sup>[3]</sup> 4,4'-diazido-3,3',5,5'-tetramethylbiphenyl **6**,<sup>[3]</sup> 1,5-naphthalenediazide **7**,<sup>[4]</sup> tetrakis(4-azidophenyl)methane **8**<sup>[5]</sup> were obtained according to literature procedures.

## I - Experimental Protocol

### II - 1) Synthesis of **2** and **3**

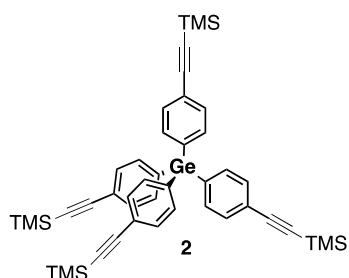

In a 100 mL Schlenk flask, tetrakis(4-bromophenyl)germanium (0.750 g, 1.077 mmol, 1 equiv.), copper(I)iodide (0.032g, 0.017 mmol, 0.16 equiv.), [PdCl<sub>2</sub>(PPh<sub>3</sub>)<sub>2</sub>] (0.136 g, 0.19 mmol, 0.18 equiv.), and triphenylphosphine (0.102 g, 0.39 mmol, 0.36 equiv.), were dissolved in distilled di-isopropylamine (25 mL), and trimethylsilylacetylene (2.3 mL, 1.586 g, 16.15 mmol, 15.0 equiv.) was added subsequently. The yellow mixture turned rapidly in a dark solution after 30 minutes. The resulting suspension was stirred at 80 °C for 24 h, after which the reaction mixture was allowed to cool to room temperature. The solution was evaporated to dryness, then re-dissolved in a minimum amount of CH<sub>2</sub>Cl<sub>2</sub> and purified by column chromatography (SiO<sub>2</sub>, 100% pentane) to afford quantitatively tetrakis(4-trimethylsilylethynyl)phenylgermanium **2** (0.803 g) as a brownish solid. <sup>1</sup>H NMR (300 MHz, CDCl<sub>3</sub>, δ): 0.25 (s, 36 H), 7.37 (AA'BB', <sup>3</sup>J = 8.1 Hz, 8 H), 7.46 (AA'BB', <sup>3</sup>J = 8.1 Hz, 8 H); <sup>13</sup>C NMR (100 MHz, CDCl<sub>3</sub>, δ): 0.1 (CH<sub>3</sub>), 95.7 (C<sub>quart</sub>), 104.9 (C<sub>quart</sub>), 124.4 (C<sub>quart</sub>), 131.8 (CH), 135.1 (CH), 135.9 (C<sub>quart</sub>). IR (ATR): ν = 2958 (s), 2160 (s), 1589 (vs), 1537 (vs), 1488 (s), 1381 (s), 1306 (vs), 1247 (m), 1223 (vs), 1184 (s), 1083 (s), 1018 (s), 861 (s), 839 (s), 824 (vw), 758 (m), 699 (s), 665 (s), 641 (vs), 611 (s), 542 (w), 424 (s) cm<sup>-1</sup>. – EA calc. for (C<sub>44</sub>H<sub>52</sub>SiGe): C 69.01, H 6.84; found C 68.95, H 6.92.

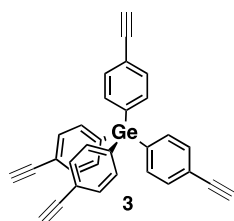

To a solution of tetrakis(4-trimethylsilylethynyl)phenylgermanium (0.767 g, 1.001 mmol, 1 equiv.) in THF (45 mL) was added potassium carbonate in powder (6.643 g, 0.048 mol, 48 equiv.), followed by methanol (50 mL) dropwise. The resulting yellow suspension was stirred at room temperature for 48 h. Solvents were removed in vacuo and the resulting solid was dissolved in a mixture of CH<sub>2</sub>Cl<sub>2</sub>:H<sub>2</sub>O (1:1 v/v, 500 mL). The organic fraction was decanted and separated. The aqueous phase was extracted twice with CH<sub>2</sub>Cl<sub>2</sub> (2 x 100 mL). The organic phase were united, washed with brine (70 mL), dried over sodium sulfate and evaporated to dryness. The crude mixture was then passed through a plug of silica (SiO<sub>2</sub>, 100% pentane) eluting with 50/50 : pentane/CH<sub>2</sub>Cl<sub>2</sub> to afford the desired tetrakis(4-ethynylphenyl)germanium **3** (0.433 g, 90%). <sup>1</sup>H NMR (300 MHz, CDCl<sub>3</sub>, δ): 3.13 (s, 4 H), 7.44 (AA'BB', <sup>3</sup>J = 8.0 Hz, 8 H), 7.52 (AA'BB', <sup>3</sup>J = 8.0 Hz, 8 H); <sup>13</sup>C NMR (100 MHz, CDCl<sub>3</sub>, δ): 78.5 (C<sub>quart</sub>), 83.4 (CH), 123.5 (C<sub>quart</sub>), 132.1 (CH), 135.2 (CH), 136.1 (C<sub>quart</sub>). IR (ATR): ν = 3250 (s), 1539 (vs), 1485 (s), 1383 (s), 1301 (vs), 1246 (m), 1224 (vs), 1182 (s), 1085 (s), 1019 (s), 863 (s), 837 (s), 825 (vw), 757 (m), 698 (s), 667 (s), 639 (vs), 612 (s), 545 (w), 423 (s) cm<sup>-1</sup>. – EA calc. for (C<sub>32</sub>H<sub>20</sub>Ge): C 80.55, H 4.22; found C 80.48, H 4.17.

### II - 2) General procedure for the synthesis of **9-14**

4,4'-diazidophenyl derivative (2 equiv.), tetrakis(4-ethynylphenyl)derivative (1 equiv.), CuSO<sub>4</sub>·5H<sub>2</sub>O (10 mol% per azido functional group), sodium ascorbate (10 mol% per azido functional group) were dissolved in abs. DMF (20 mL). The reaction mixture was then heated at 100 °C for 24 h. After that, the reaction mixture was cooled down to room temperature and filtered using a Büchner funnel. The resulting brown solid was successively washed with sat. basic EDTA solution till the washing phase was colourless, followed by subsequent washing with water (3 x 20 mL), methanol (2 x 30 mL), THF (2 x 30 mL). The resulting material was then extracted with hot THF during 24 h before being filtered

and washed with dichloromethane. The final brownish product was insoluble in all common solvents. For further analyses, the resulting material was dried at 100 °C at 10<sup>-6</sup> mbar for 16 h.

**HCP 9.** Starting from **3** (0.149 g, 0.36 mmol, 1 equiv.), **5** (0.212 g, 0.72 mmol, 2 equiv.), CuSO<sub>4</sub>·5H<sub>2</sub>O (0.036 g, 0.014 mmol) and sodium ascorbate (0.028 g, 0.014 mmol) and following the general procedure, HCP **9** was obtained in 54% yield (0.195 g). IR (ATR):  $\nu$  = 1601 (vs), 1503 (m), 1453 (s), 1385 (s), 1240 (s), 1097 (s), 1014 (vw), 985 (s), 800 (vw), 718 (s), 523 (m), 408 (m) cm<sup>-1</sup>. – EA calc. for (C<sub>60</sub>H<sub>44</sub>O<sub>4</sub>N<sub>12</sub>Ge): C 67.37, H 4.15, N 15.71; found C 62.88, H 4.18, N 11.48.

**HCP 10.** Starting from **4** (0.186 g, 0.44 mmol, 1 equiv.) and **5** (0.264 g, 0.89 mmol, 2 equiv.) CuSO<sub>4</sub>·5H<sub>2</sub>O (0.044 g, 0.018 mmol) and sodium ascorbate (0.035 g, 0.012 mmol) and following the general procedure, HCP **10** was obtained in 68% yield (0.306 g). IR (ATR):  $\nu$  = 1600 (s), 1487 (m), 1390 (s), 1248 (s), 1015 (w), 986 (vs), 806 (vw), 559 (s), 464 (vs), 411 (vs) cm<sup>-1</sup>. – EA calc. for (C<sub>61</sub>H<sub>44</sub>O<sub>4</sub>N<sub>12</sub>): C 72.61, H 4.40, N 16.66; found C 72.65, H 4.52, N 8.51.

**HCP 12.** Starting from **4** (0.145 g, 0.34 mmol, 1 equiv.) and **6** (0.204 g, 0.69 mmol, 2 equiv.) CuSO<sub>4</sub>·5H<sub>2</sub>O (0.035 g, 0.014 mmol) and sodium ascorbate (0.028 g, 0.014 mmol) and following the general procedure, HCP **12** was obtained in 54% yield (0.190 g). <sup>13</sup>C CP/MAS NMR (400 MHz,  $\delta$ ): 21.4 (br, CH<sub>3</sub>), 69.2 (br, C<sub>quart</sub>, C(Ar)<sub>4</sub>), 125.9 (br, C<sub>quart</sub>), 133.3 (br, CH), 139.4 (br), 151.4 (br) ppm. – IR (ATR):  $\nu$  = 1598 (m), 1477 (m), 1379 (vs), 1216 (s), 1016 (m), 985 (s), 860 (s), 821 (vw), 734 (vs), 545 (s), 448 (s) cm<sup>-1</sup>. – EA calc. for (C<sub>65</sub>H<sub>52</sub>N<sub>12</sub>): C 77.98, H 5.23, N 16.79; found C 71.15, H 4.93, N 8.71.

**HCP 13.** Starting from **3** (0.098 g, 0.24 mmol, 1 equiv.) and **7** (0.101 g, 0.48 mmol, 2 equiv.) CuSO<sub>4</sub>·5H<sub>2</sub>O (0.035 g, 0.014 mmol) and sodium ascorbate (0.028 g, 0.014 mmol) and following the general procedure, HCP **13** was obtained in 87 % yield (0.173 g). IR (ATR):  $\nu$  = 1590 (s), 1512 (vs), 1435 (s), 1223 (s), 1081 (s), 1014 (m), 965 (vs), 820 (vs), 783 (vw), 708 (vs), 666 (s), 519 (m), 466 (vs), 449 (s) cm<sup>-1</sup>. – EA calc. for (C<sub>52</sub>H<sub>32</sub>N<sub>12</sub>Ge): C 69.59, H 3.59, N 18.73; found C 68.29, H 3.60, N 11.59.

**HCP 14.** Starting from **4** (0.100 g, 0.24 mmol, 1 equiv.) and **7** (0.141 g, 0.48 mmol, 2 equiv.) CuSO<sub>4</sub>·5H<sub>2</sub>O (0.016 g, 0.08 mmol) and sodium ascorbate (0.020 g, 0.008 mmol) and following the general procedure, HCP **14** was obtained in 58% yield (0.140 g). <sup>13</sup>C CP/MAS NMR (400 MHz,  $\delta$ ): 68.8 (br, C<sub>quart</sub>, C(Ar)<sub>4</sub>), 131.9 (br), 137.1 (br), 151.2 (br) ppm. – IR (ATR):  $\nu$  = 2001 (s), 1598 (s), 1492 (s), 1439 (s), 1216 (s), 1014 (m), 821 (vs), 783 (vw), 541 (s), 514 (vs), 449 (s), 424 (s) cm<sup>-1</sup>. – EA calc. for (C<sub>43</sub>H<sub>26</sub>N<sub>6</sub>): C 82.41, H 4.18, N 13.41; found C 73.83, H 3.94, N 12.50.

### II - 3) General procedure for the synthesis of **15**

Tetrakis(4-azidophenyl)methane **8** (0.200 g, 0.41 mmol, 1 equiv.), tetrakis(4-ethynylphenyl)germanium **3** (0.197 g, 0.41 mmol, 1 equiv.), CuSO<sub>4</sub>·5H<sub>2</sub>O (0.040 g, 0.02 mmol, 10 mol% per azido functional group), sodium ascorbate (0.032 g, 0.02 mmol, 10 mol%) were dissolved in the appropriate solvent (40 mL). The reaction mixture was then heated to 150 °C for 24 h. After that, the reaction mixture was cooled down to room temperature and filtered using a Büchner funnel. The resulting brown solid was successively washed with sat. basic EDTA solution till the washing phase was colourless, followed by subsequent washing with water (3 x 20 mL), methanol (2 x 30 mL), THF (2 x 30 mL). The resulting material was then extracted with hot THF during 24 h during 16 h before being filtered and washed with dichloromethane. The final brownish product **15** was insoluble in all common solvents (0.370 g, 93 %). For further analyses, the resulting material was dried at 100 °C at 10<sup>-6</sup> mbar during 16 h.

**POP 15.** <sup>13</sup>C CP/MAS NMR (400 MHz,  $\delta$ ): 68.9 (br, C<sub>quart</sub>, C(Ar)<sub>4</sub>), 124.0 (br), 130.1 (br), 135.7 (br), 139.6 (br), 152.2 (br) ppm. IR (ATR):  $\nu$  = 3351 (m), 1600 (m), 1507 (vw), 1399 (s), 1225 (s), 1186 (vs), 1041 (m), 1016 (vs), 993 (m), 820 (vw), 705 (s), 824 (vw), 526 (m), 465 (vs), 449 (s) cm<sup>-1</sup>. – EA calc. for (C<sub>57</sub>H<sub>36</sub>N<sub>12</sub>Ge): C 71.19, H 3.77, N 17.48; found C 59.25, H 3.86, N 10.86.

Table S1. Screening of the reaction conditions for the synthesis of **15**.

| Entry | Solvent | Base             | Temperature | Time | Yield (%) | Specific Surface Area <sup>[a]</sup> |          | Total pore volume <sup>[b]</sup> |
|-------|---------|------------------|-------------|------|-----------|--------------------------------------|----------|----------------------------------|
|       |         |                  |             |      |           | BET                                  | Langmuir |                                  |
| 1     | THF     | NEt <sub>3</sub> | 60          | 5 d. | 95        | 130                                  | 227      | 0.0547                           |
| 2     | DMF     | /                | 100         | 5 d. | 93        | 660                                  | 992      | 0.3067                           |
| 3     | DMF     | /                | 150         | 24 h | 90        | 881                                  | 1301     | 0.4293                           |

<sup>[a]</sup> Surface area calculated over the relative pressure range  $P/P_0 = 0.05-0.3$ . Specific surface area is expressed in  $\text{m}^2\text{g}^{-1}$ . <sup>[b]</sup> Total pore volume for  $P/P_0 = 0.99$  and is expressed in  $\text{cm}^3\text{g}^{-1}$ .

#### II - 4) General procedure for the synthesis of **16**

Tetrakis(4-azidophenyl)methane **8** (0.279 g, 0.576 mmol, 2 equiv.), tetrakis(4-ethynylphenyl)germanium **3** (0.137 g, 0.28 mmol, 1 equiv.), tetrakis(4-ethynylphenyl)methane **4** (0.120 g, 0.28 mmol, 1 equiv.), CuSO<sub>4</sub>·5H<sub>2</sub>O (0.056 g, 0.22 mmol, 0.1 equiv. per azido functional group), sodium ascorbate (0.045 g, 0.22 mmol) were dissolved in dist. DMF (40 mL). The reaction mixture was then heated to 150 °C for 24 h. After that, the reaction mixture was cooled down to room temperature and filtered using a Büchner funnel. The resulting brown solid was successively washed with sat. EDTA solution till the washing phase was colourless, followed by subsequent washing with water (3 x 20 mL), methanol (2 x 30 mL), THF (2 x 30 mL). The resulting material was then extracted with hot THF during 24 h before being filtered and washed with dichloromethane. The final brownish product **16** was insoluble in all common solvents (0.376 g, 90 %). For further analyses, the resulting material was dried at 150 °C at 10<sup>-6</sup> mbar for 16 h.

**POP 16.** <sup>13</sup>C CP/MAS NMR (400 MHz,  $\delta$ ): 68.7 (br, C<sub>quart</sub>, C(Ar)<sub>4</sub>), 123.8 (br), 129.5 (br), 132.9 (br), 135.5 (br), 139.8 (br), 152.3 (br) ppm. – IR (ATR):  $\nu = 3373$  (m), 2120 (s), 1602 (s), 1503 (w), 1402 (vs), 1280 (vs), 1223 (s), 1103 (vs), 1040 (s), 1016 (vs), 993 (m), 916 (vs), 821 (vw), 705 (s), 530 (m), 449 (vs)  $\text{cm}^{-1}$ . – EA calc. for (C<sub>115</sub>H<sub>72</sub>N<sub>24</sub>Ge): C 74.16, H 3.90, N 18.05; found C 65.24, H 4.32, N 14.65.

#### II - 5) General procedure for the synthesis of **17**

Tetrakis(4-azidophenyl)methane **8** (0.120 g, 0.29 mmol, 1 equiv.), tetrakis(4-ethynylphenyl)methane **4** (0.140 g, 0.29 mmol, 1 equiv.), CuSO<sub>4</sub>·5H<sub>2</sub>O (0.028 g, 10 mol% per azido functional group), sodium ascorbate (0.023 g, 10 mol%) were dissolved in dist. DMF (22 mL). The reaction mixture was then heated to 150 °C for 24 h. After that, the reaction mixture was cooled down to room temperature and filtered using a Büchner funnel. The resulting brown solid was successively washed with sat. basic EDTA solution till the washing phase was colourless, followed by subsequent washing with water (3 x 20 mL), methanol (2 x 30 mL), THF (2 x 30 mL). The resulting material was then extracted with hot THF during 16 h before being filtered and washed with dichloromethane. The final brownish product **17** was insoluble in all common solvents (0.213 g, 82 %). For further analyses, the resulting material was dried at 100 °C at 10<sup>-6</sup> mbar during 6 h.

**POP 17.** IR (ATR):  $\nu = 3355$  (m), 1598 (m), 1509 (vw), 1403 (s), 1228 (s), 1186 (vs), 1039 (m), 1015 (vs), 991 (m), 822 (vw), 704 (s), 822 (vw), 528 (m), 464 (vs), 451 (s)  $\text{cm}^{-1}$ . – EA calc. for (C<sub>58</sub>H<sub>36</sub>N<sub>12</sub>): C 77.32, H 4.03, N 18.66; found C 65.11, H 3.68, N 14.35.

## II - 6) General procedure for the synthesis of **18** and **19**

### ➤ II - 6 - Route a): reaction with iodine monochloride (ICl).<sup>[6]</sup>

#### *General considerations:*

*This method was adapted from the procedure developed by Bhattacharya and coll..<sup>[6]</sup> It has been reported as a very useful one step preparation of  $Ar_3GeCl$  and constituted an excellent alternative to the procedure involving heating of  $Ar_4Ge$  with  $GeCl_4$  in presence of  $AlCl_3$ .<sup>[7]</sup> Iodine monobromine on the other hand did not react under similar conditions, and when prolonging a refluxing period in ethylene bromide, only 5% of  $Ph_3GeBr$  was obtained. Tetrabutylgermanium also failed to react with ICl and IBr. In these reactions, the colour of IX was not discharged and the organo-germanium compounds were recovered quantitatively.*

According to these considerations, a colour change of the reaction mixture could constitute a qualitative method of monitoring the reaction completion.

Moreover, in the original procedure performed on tetraphenylgermanium, no trace of diphenylgermanium dichloride was observed even in presence of an excess of iodine monochloride (1.3 mol, 260 equiv.).

#### *General procedure:*

A solution of ICl (Y equiv.) in  $CCl_4$  (5 mL) was slowly added with vigorous stirring to a suspension of germanium based-POP **15** (0.050 g, 0.052 mmol, 1 equiv.) in  $CCl_4$  (5 mL). The blood-red colour of ICl solution slowly changed light pinkish-brown. The reaction mixture was stirred overnight and the resulting solid was filtered and extensively washed with petroleum ether (20 mL), methanol, THF and dichloromethane.

The label **18-Y**<sub>ICl</sub> corresponds to POP **15** reacted with Y equivalents of ICl.

**18-1**<sub>ICl</sub>. Starting from **15** and ICl (2.7  $\mu$ L, 0.008 g, 0.052 mmol, 1 equiv.) and following the general procedure, 0.046 g of **18-1**<sub>ICl</sub> was obtained. IR (ATR):  $\nu = 3353$  (s), 2117 (s), 1601 (s), 1505 (m), 1434 (vs), 1396 (s), 1284 (vs), 1225 (s), 1101 (vs), 1035 (s), 992 (w), 820 (w), 704 (s), 524 (m)  $cm^{-1}$ . – EA found C 56.33, H 3.40, N 12.88. – TGA.

**18-10**<sub>ICl</sub>. Starting from **15** and ICl (27  $\mu$ L, 0.084 g, 0.52 mmol, 10 equiv.) and following the general procedure, 0.043 g of **18-10**<sub>ICl</sub> was obtained. IR (ATR):  $\nu = 3365$  (m), 2125 (s), 1602 (s), 1508 (w), 1434 (vs), 1398 (s), 1284 (vs), 1226 (s), 1103 (vs), 1041 (m), 993 (m), 822 (vw), 704 (s), 525 (m)  $cm^{-1}$ . – EA found C 58.88, H 3.86, N 13.35. – TGA.

### ➤ II - 6 - Route b): reaction with trifluoromethanesulfonic acid (TfOH).<sup>[8]</sup>

#### • *General considerations:*

*This method was adapted from the procedure developed by Zaitsev and coll..<sup>[8]</sup>*

In the original procedure performed on tetraphenylgermanium, no trace of diphenylgermanium dichloride was observed even in presence of an excess of 2 equivalents of triflic acid.

#### • *Control procedure performed on tetrakis(4-ethynylphenyl)germane:*

Trifluoromethanesulfonic acid (4.6  $\mu$ L, 0.008 g, 0.052 mmol, 1 equiv.) was added at 0 °C to a solution of tetrakis(4-ethynylphenyl)germane **3** (0.025g, 0.052 mmol, 1 equiv.) in  $CH_2Cl_2$  (5 mL). The reaction mixture was allowed to warm to room temperature and stirred overnight. The resulting reaction mixture was hydrolyzed with ethanol, decanted and separated. The organic phase was dried over  $Na_2SO_4$ , filtrated and evaporated to dryness.

$^1\text{H}$  NMR in  $\text{CDCl}_3$

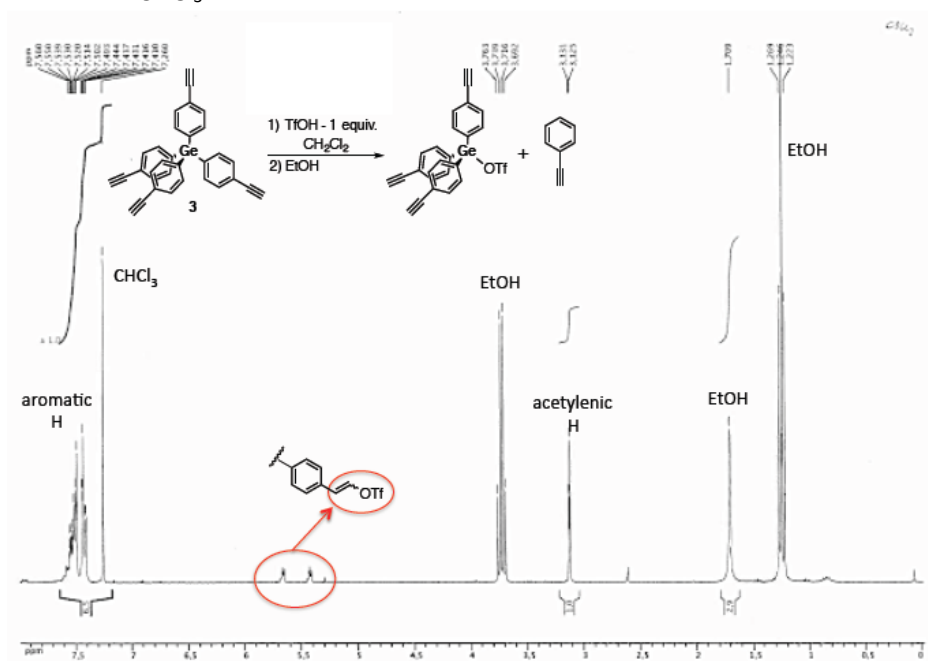

- *General procedure:*

Trifluoromethanesulfonic acid ( $Y$  equiv.) was added at  $0\text{ }^\circ\text{C}$  to the suspension of the desired germanium based-POP **X** (1 equiv.) in  $\text{CH}_2\text{Cl}_2$  (5 mL). The reaction mixture was allowed to warm to room temperature and stirred overnight. The resulting solid was filtrated and extensively washed with water, methanol, THF and  $\text{CH}_2\text{Cl}_2$  to afford **X+3** as a brown solid, insoluble in common solvents.

The label **X+3- $Y_{\text{TfOH}}$**  corresponds to POP **X** reacted with  $Y$  equivalents of TfOH.

**18-1 $_{\text{TfOH}}$** . Starting from **15** (0.050 g, 0.052 mmol, 1 equiv.) and TfOH (4.6  $\mu\text{L}$ , 0.008 g, 0.052 mmol, 1 equiv.) and following the general procedure, 0.037 g of **18-1 $_{\text{TfOH}}$**  was obtained. IR (ATR):  $\nu = 3412$  (s), 2124 (s), 1603 (s), 1508 (m), 1400 (vs), 1224 (m), 1167 (s), 1028 (vw), 993 (s), 822 (m), 761 (s), 694 (vs), 638 (w), 516 (m), 423 (vs)  $\text{cm}^{-1}$ . – EA found C 53.36, H 3.70, N 12.19, S 2.93. – TGA.

**18-10 $_{\text{TfOH}}$** . Starting from **15** (0.050 g, 0.052 mmol, 1 equiv.) and TfOH (46  $\mu\text{L}$ , 0.078 g, 0.52 mmol, 10 equiv.) and following the general procedure, 0.039 g of **18-10 $_{\text{TfOH}}$**  was obtained. IR (ATR):  $\nu = 3426$  (s), 1621 (s), 1507 (s), 1221 (w), 1168 (s), 1085 (vs), 1023 (vw), 993 (vs), 820 (s), 763 (s), 634 (w), 574 (s), 513 (m)  $\text{cm}^{-1}$ . – EA found C 33.92, H 2.92, N 6.38, S 10.59. – TGA.

**18-100 $_{\text{TfOH}}$** . Starting from **15** (0.050 g, 0.052 mmol, 1 equiv.) and TfOH (0.46 mL, 0.780 g, 0.0052 mol, 100 equiv.) and following the general procedure, 0.042 g of **18-100 $_{\text{TfOH}}$**  was obtained. IR (ATR):  $\nu = 3427$  (s), 1623 (s), 1504 (s), 1222 (w), 1167 (s), 1088 (vs), 1021 (vw), 995 (vs), 821 (s), 761 (s), 635 (w), 573 (s), 512 (m)  $\text{cm}^{-1}$ . – EA found C 34.78, H 3.01, N 7.55, S 13.21.

**19-1 $_{\text{TfOH}}$** . Starting from **16** (0.050 g, 0.026 mmol, 1 equiv.) and TfOH (2.3  $\mu\text{L}$ , 0.0039 g, 0.026 mmol, 1 equiv.) and following the general procedure, 0.039 g of **19-1 $_{\text{TfOH}}$**  was obtained. IR (ATR):  $\nu = 3412$  (s), 2124 (s), 1603 (s), 1509 (m), 1406 (s), 1292 (vs), 1223 (s), 1031 (m), 992 (m), 824 (vw), 718 (s), 532 (m), 417 (vs)  $\text{cm}^{-1}$ . – EA found C 68.60, H 4.34, N 15.74. – TGA.

**19-100 $_{\text{TfOH}}$** . Starting from **16** (0.050 g, 0.026 mmol, 1 equiv.) and TfOH (0.23 mL, 0.390 g, 2.6 mmol, 100 equiv.) and following the general procedure, 0.035 g of **19-100 $_{\text{TfOH}}$**  was obtained. IR (ATR):  $\nu = 3363$  (s), 2116 (vs), 1602 (s), 1508 (w), 1406 (s), 1222 (m), 1029 (w), 992 (m), 822 (vw), 761 (s), 694 (s), 638 (s), 521 (s)  $\text{cm}^{-1}$ . – EA found C 64.63, H 4.25, N 13.28, S 1.49. – TGA.



- II - 6 - Route c : reaction with acetic acid (AcOH).

- *Control procedure performed on tetrakis(4-ethynylphenyl)germane:*

Acetic acid (0.15 mL, 2.6 mmol, 100 equiv.) was added at room temperature to a solution of tetrakis(4-ethynylphenyl)germane **3** (0.046g, 0.052 mmol, 1 equiv.) in methanol (5 mL). The reaction mixture was stirred overnight and subsequently hydrolyzed with water (10 mL), decanted and separated. The organic phase was dried over Na<sub>2</sub>SO<sub>4</sub>, filtrated and evaporated to dryness before being subjected to <sup>1</sup>H NMR analysis. No cleavage of the C-Ge bond was observed as no new signal appeared and only tetrakis(4-ethynylphenyl)germane **3** and acetic acid were detected by <sup>1</sup>H NMR (recorded in CDCl<sub>3</sub>).

- *General procedure:*

Acetic acid (0.15 mL, 2.6 mmol, 100 equiv.) was added at room temperature to the suspension of **16** (0.050g, 1 equiv.) in methanol (2.5 mL) and the reaction mixture was stirred overnight. The resulting solid was filtrated and extensively washed with water, methanol, THF and CH<sub>2</sub>Cl<sub>2</sub> to afford **20** as a brown solid, insoluble in common solvents. The specific surface area of **20** did not changed compared to the one of **16**.

### III - NMR Spectra of 2 and 3

III - 1)  $^1\text{H}$  NMR of **2** in  $\text{CDCl}_3$

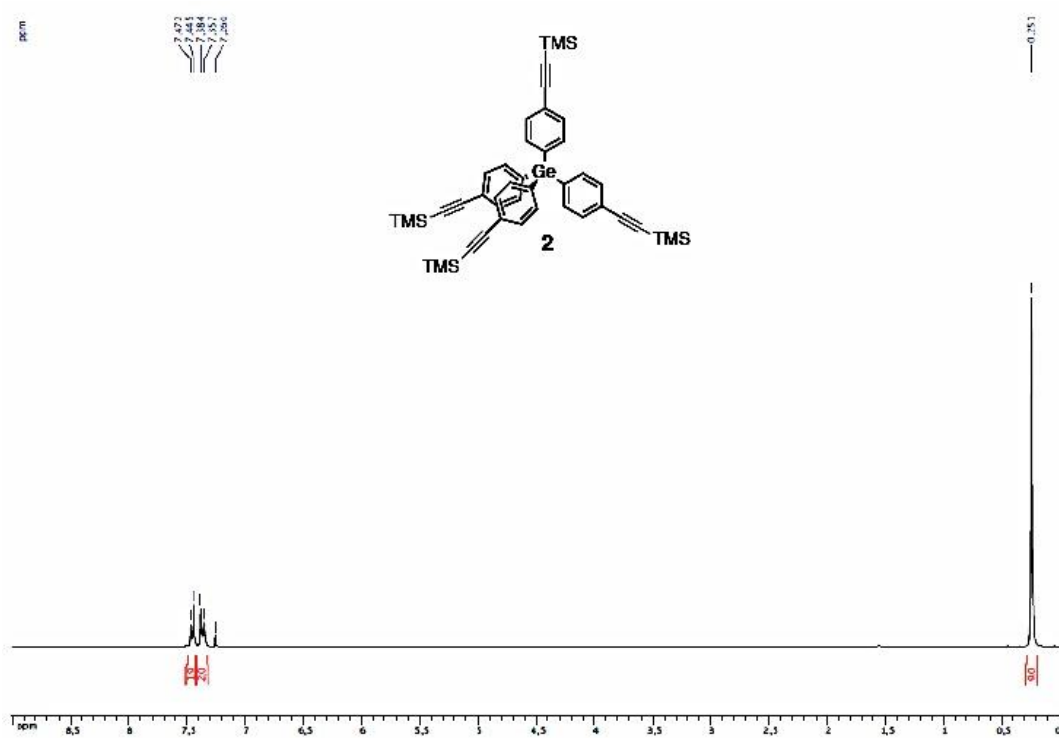

III - 2)  $^{13}\text{C}$  NMR of **2** in  $\text{CDCl}_3$

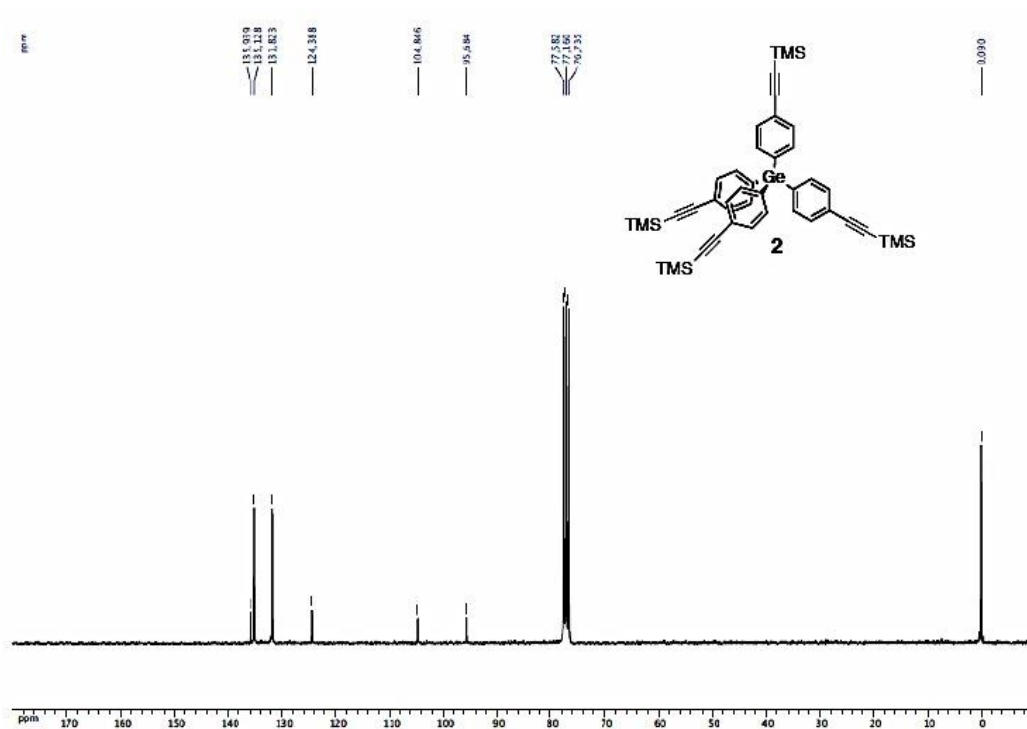



## IV - IR Spectra

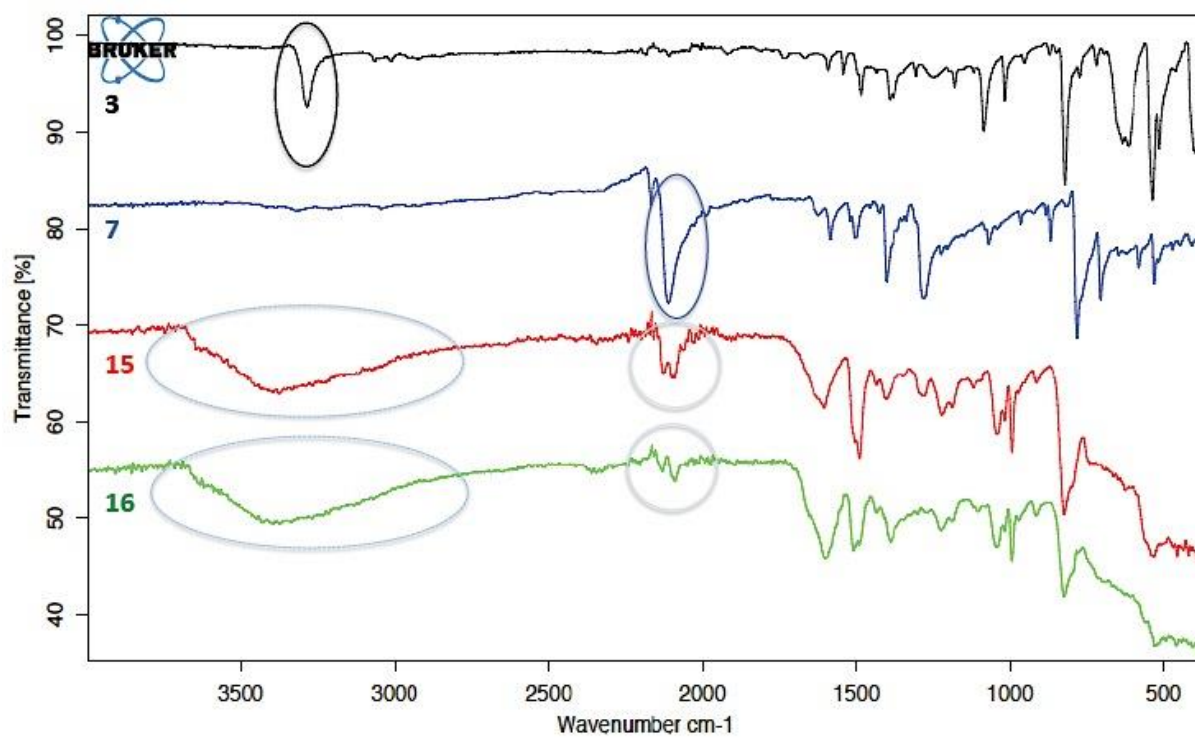

## V - DSC Analyses

^exo

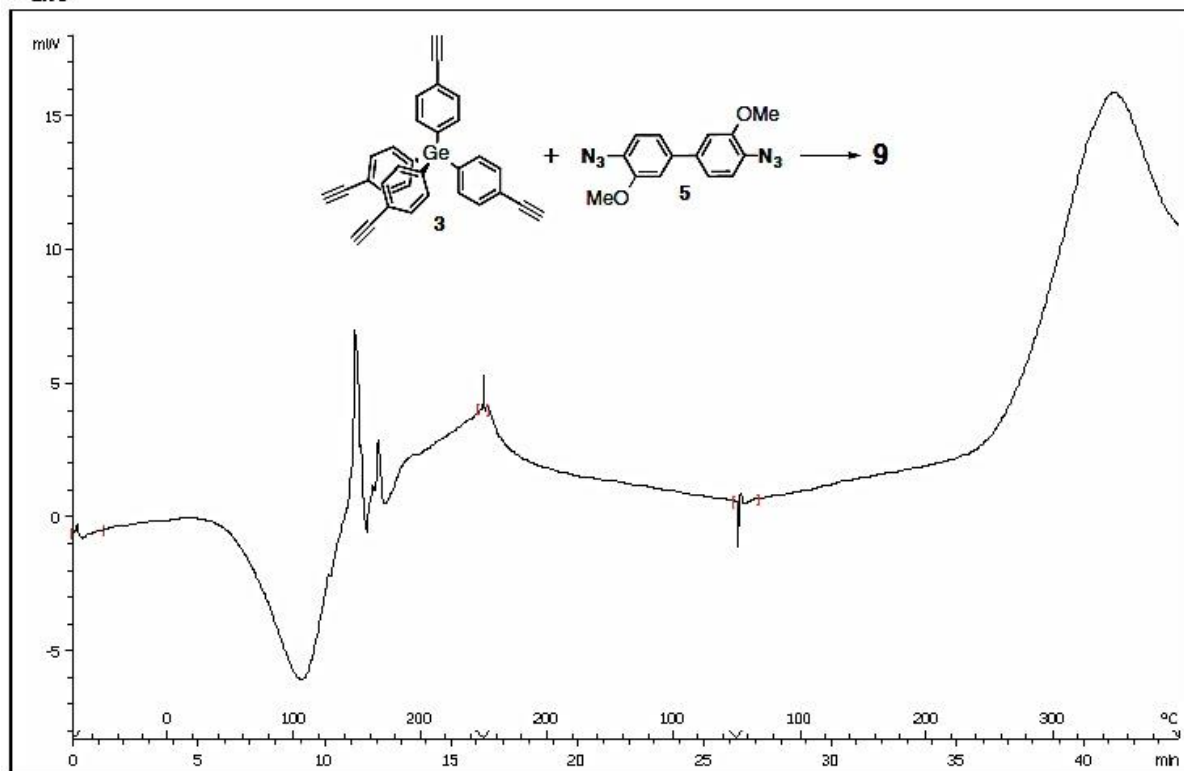

Lab: METTLER

STAR<sup>®</sup> SW 9.30

^exo

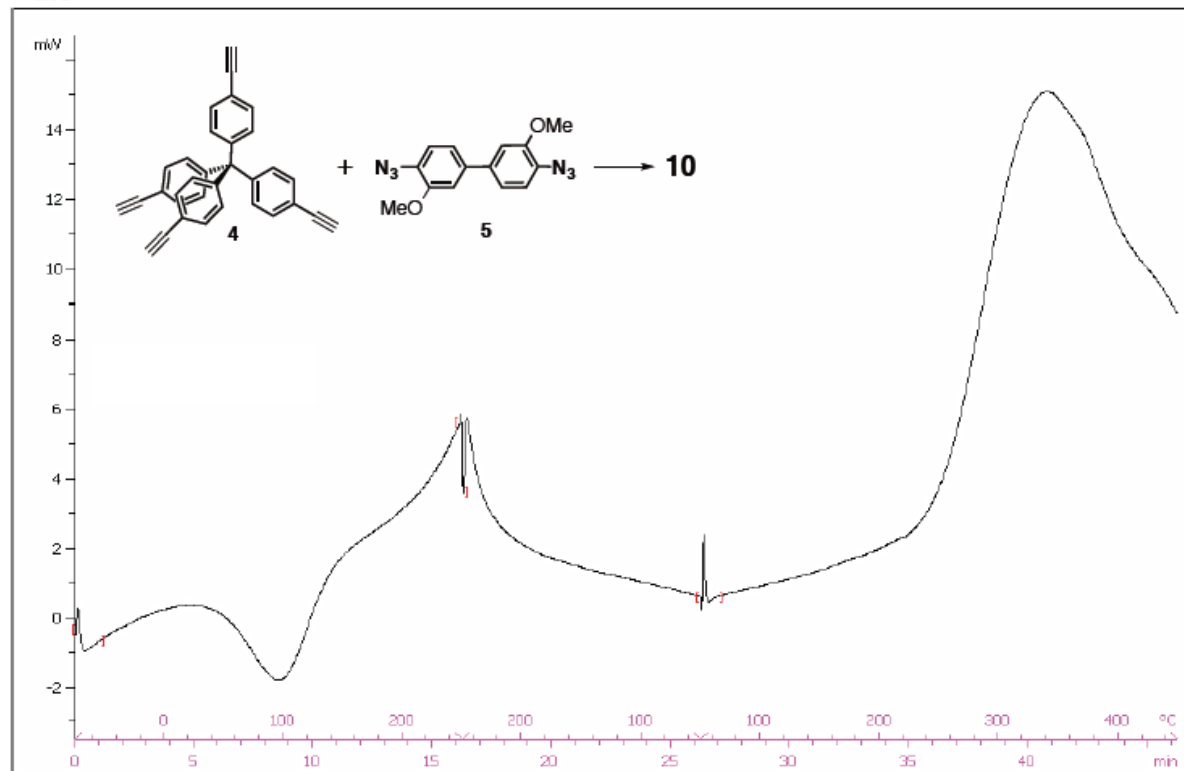

Lab: METTLER

STAR<sup>®</sup> SW 9.30

^exo

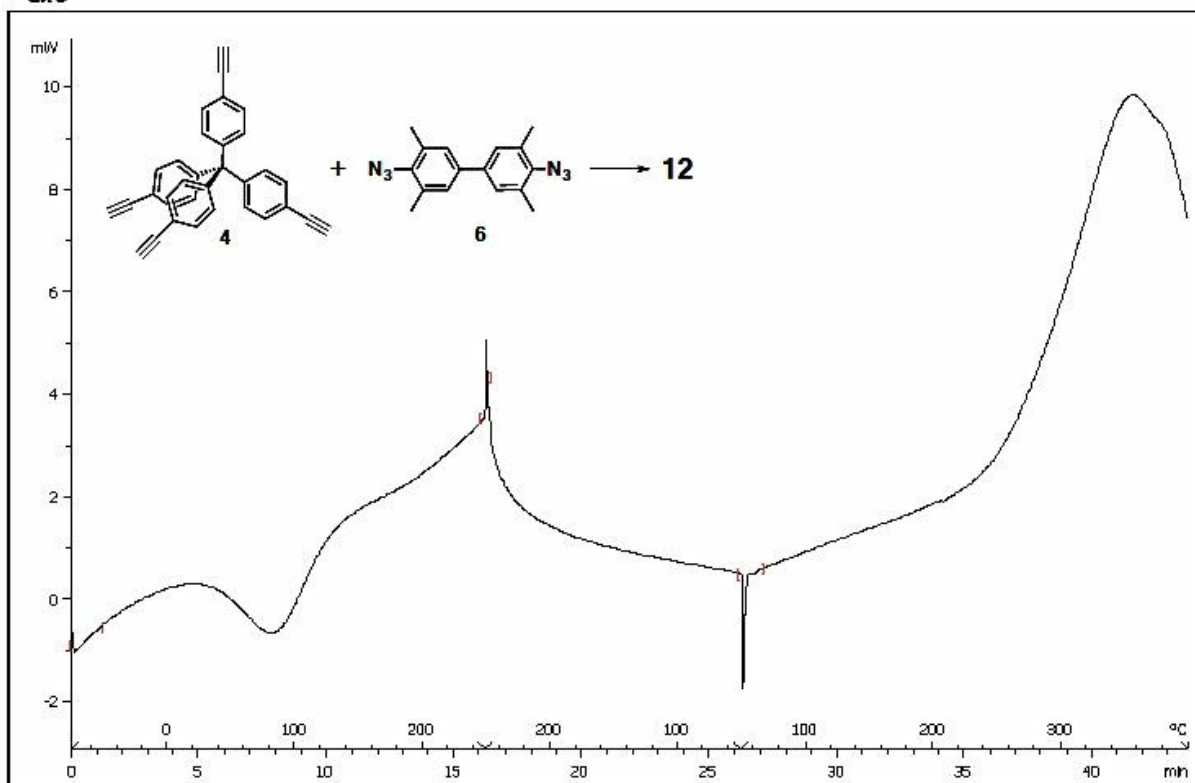

Lab: METTLER

STAR® SW 9.30

^exo

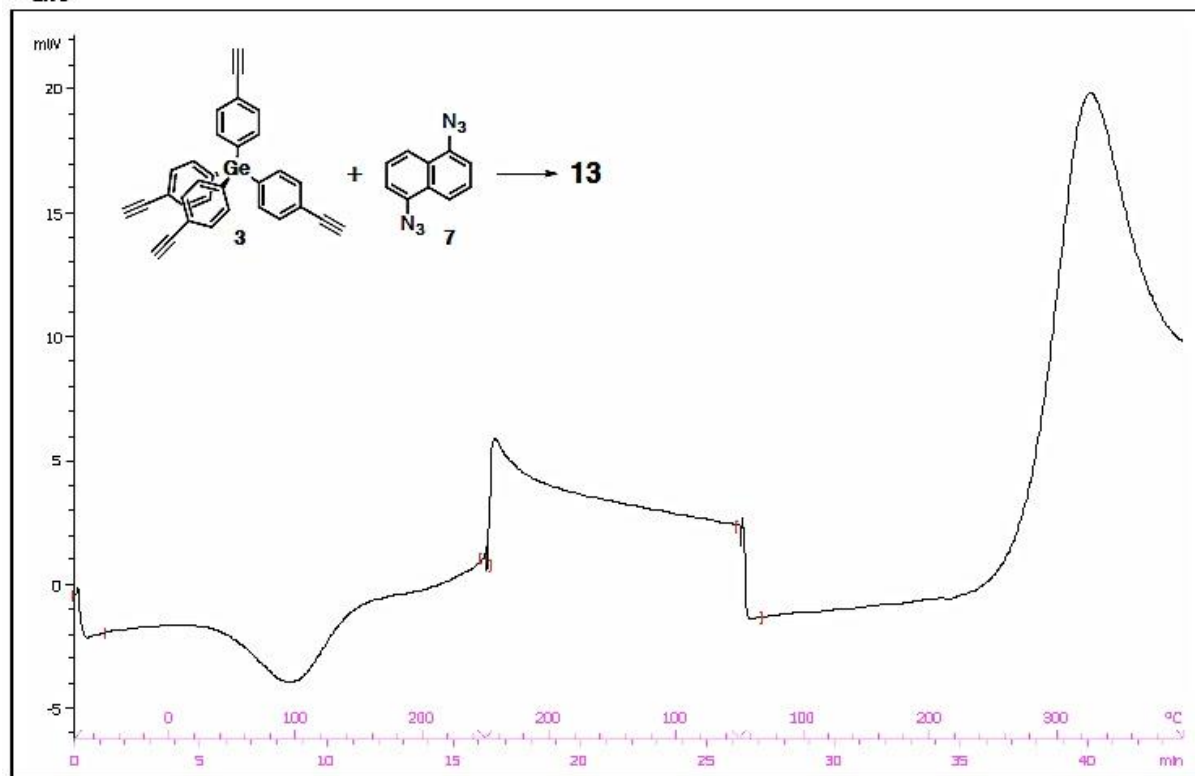

Lab: METTLER

STAR® SW 9.30

^exo

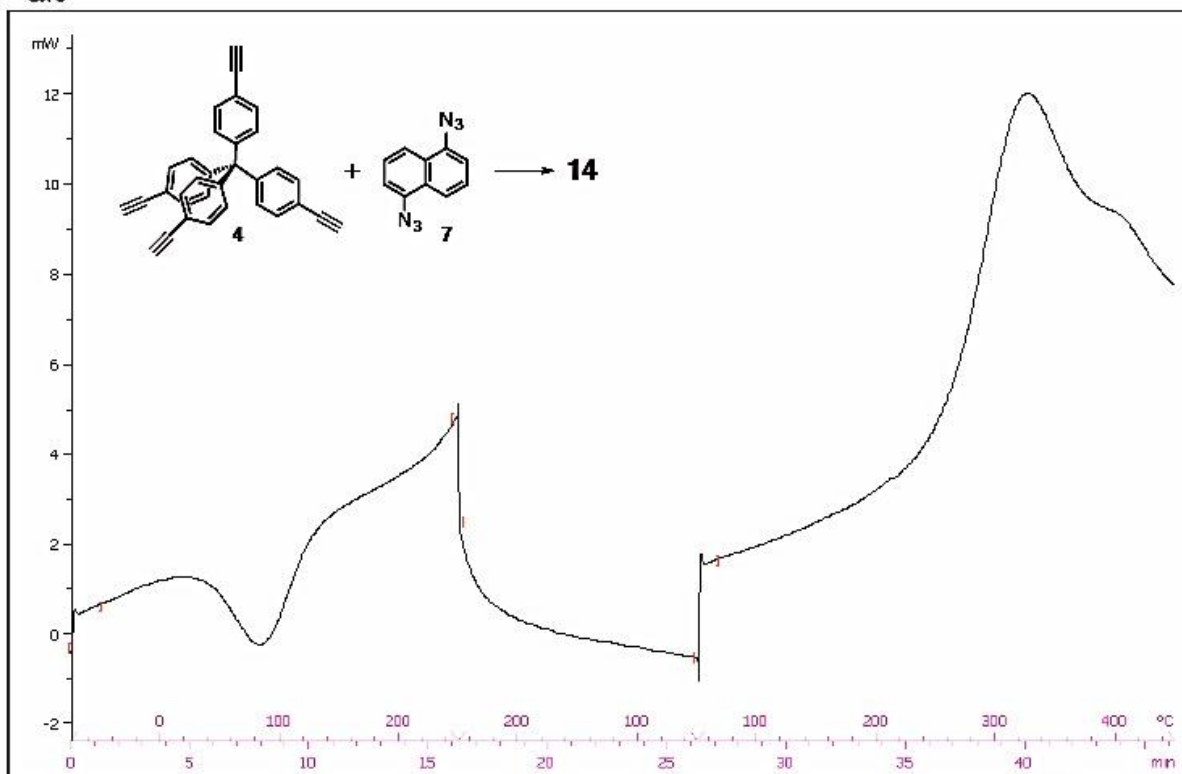

Lab: METTLER

STAR<sup>e</sup> SW 9.30

^exo

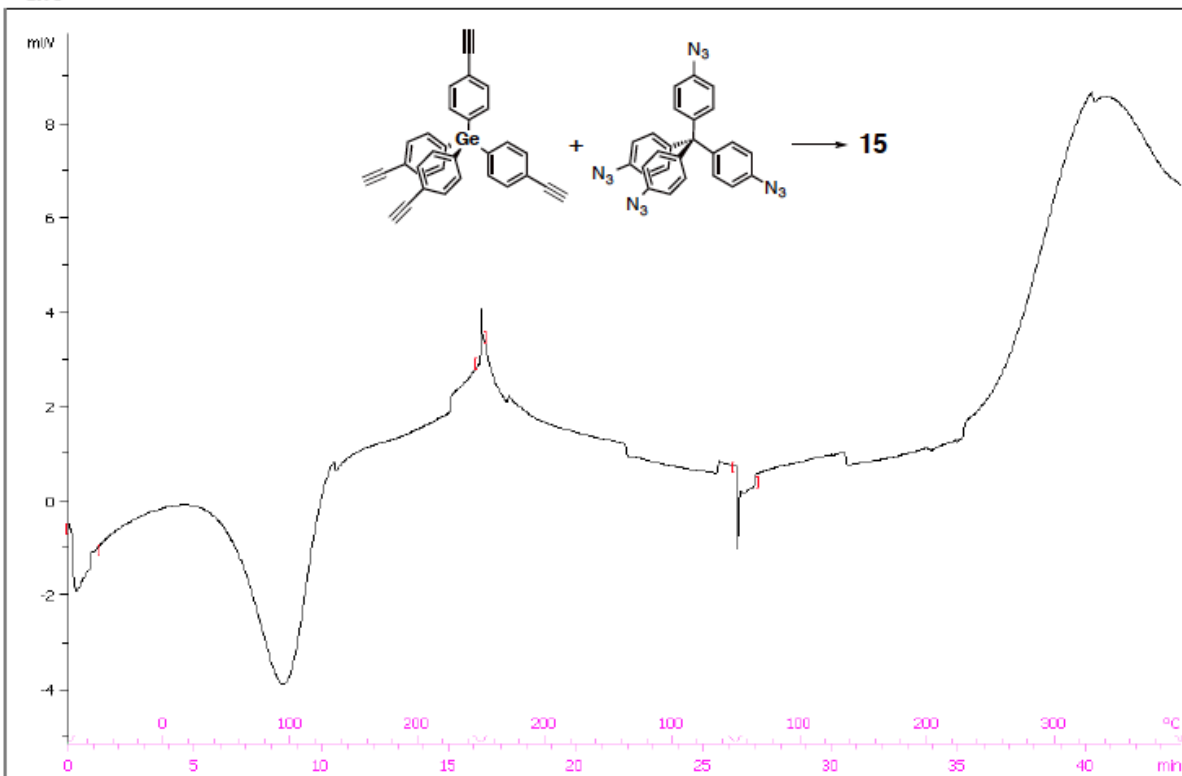

Lab: METTLER

STAR<sup>e</sup> SW 9.30

^exo

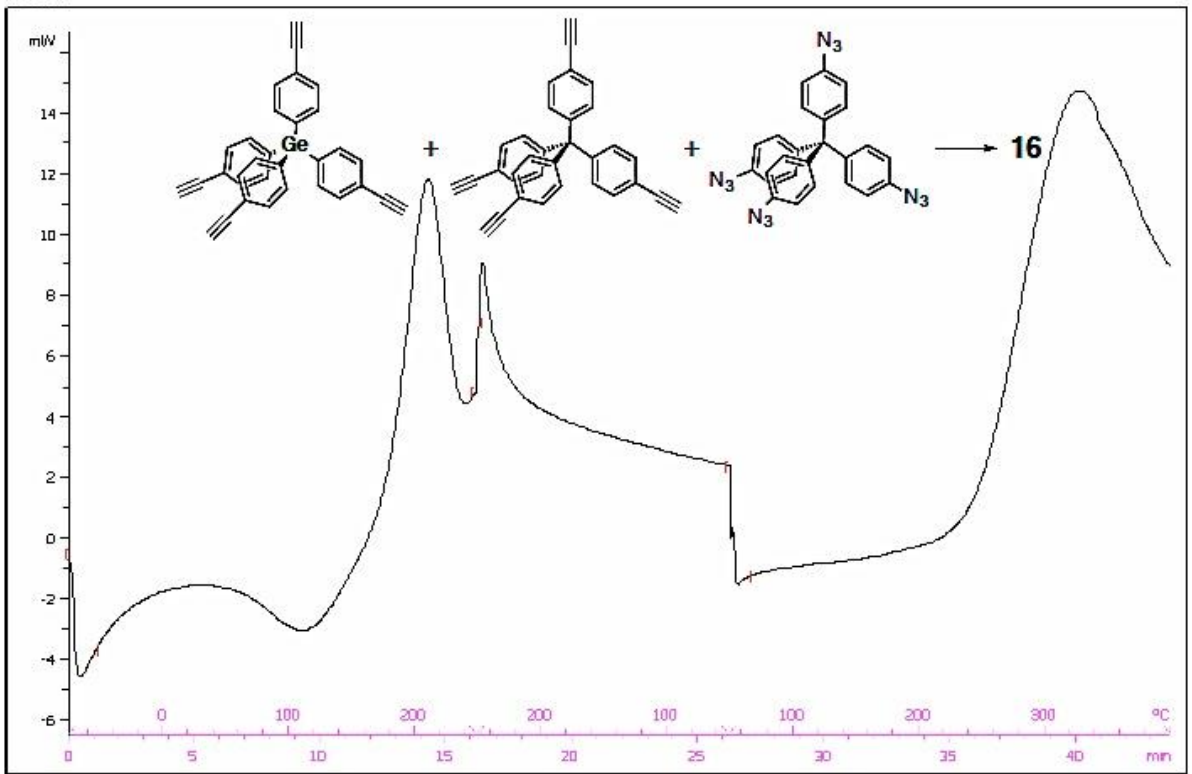

Lab: METTLER

STAR® SW 9.30



## VI - TGA Analyses

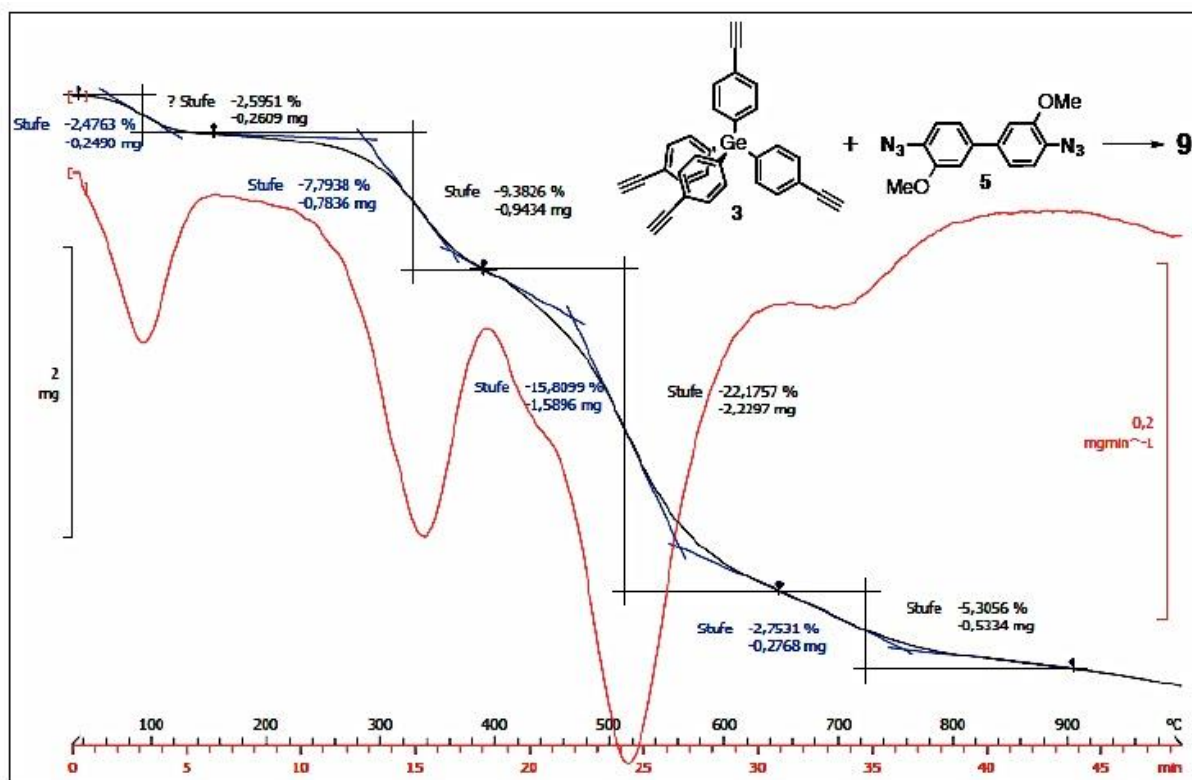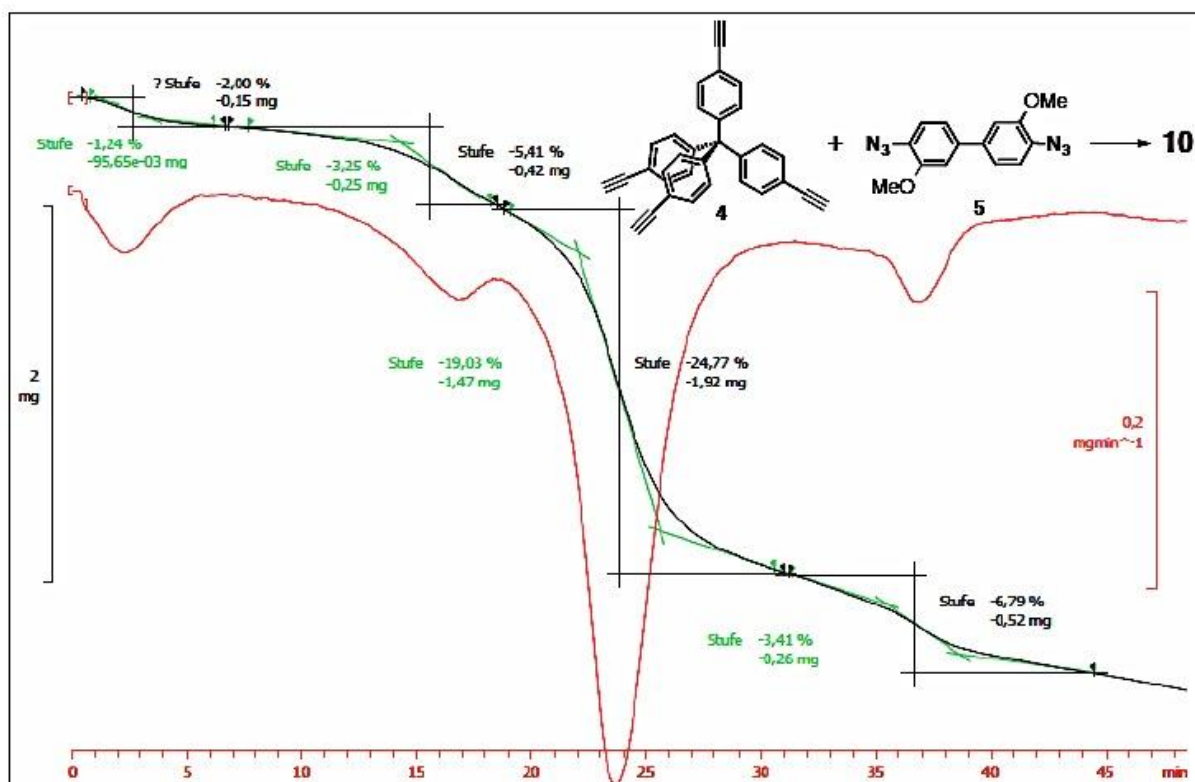



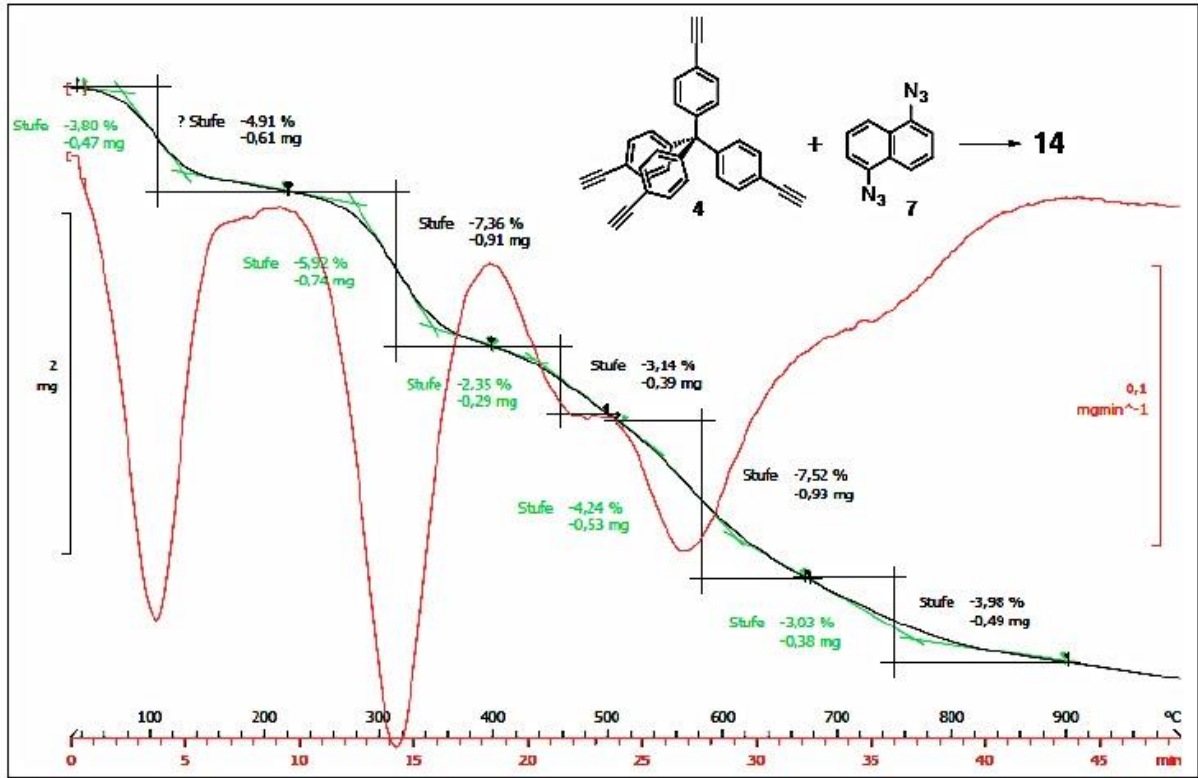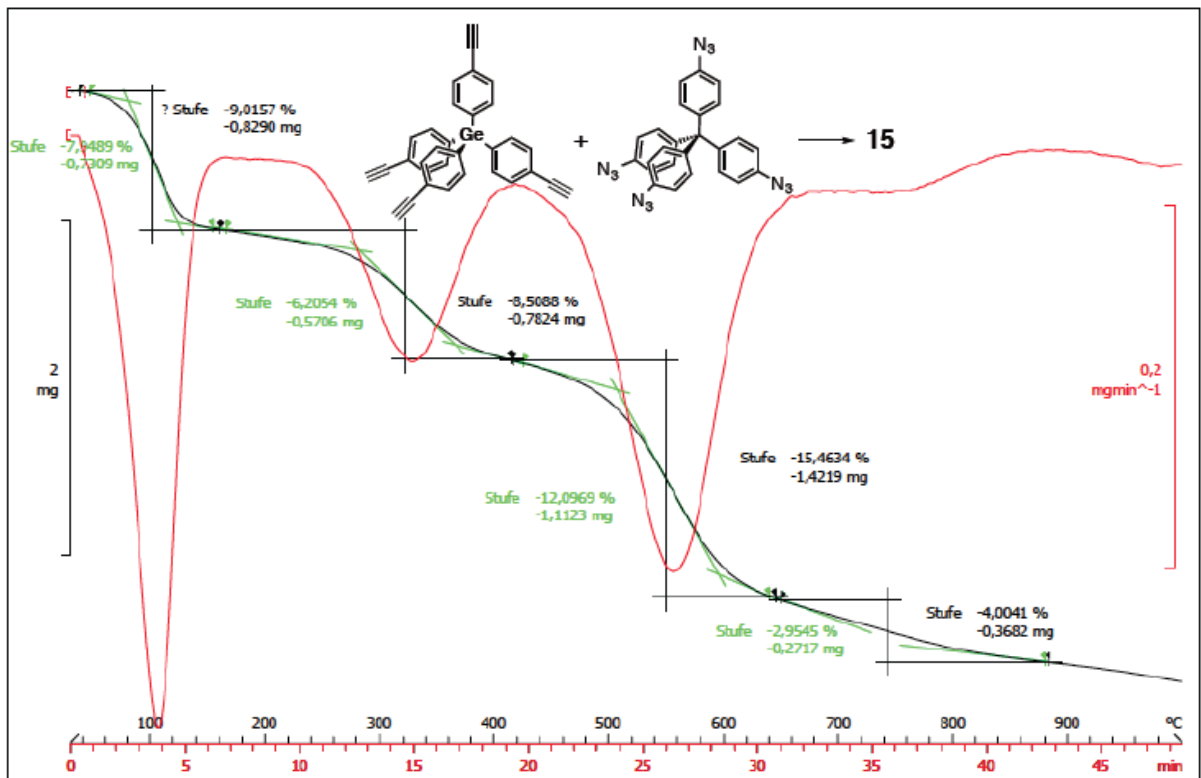



### Cleavage of 15 in presence of iodine monochloride (route a)

With 1 equiv. of ICl : TGA 18-1<sub>ICl</sub>

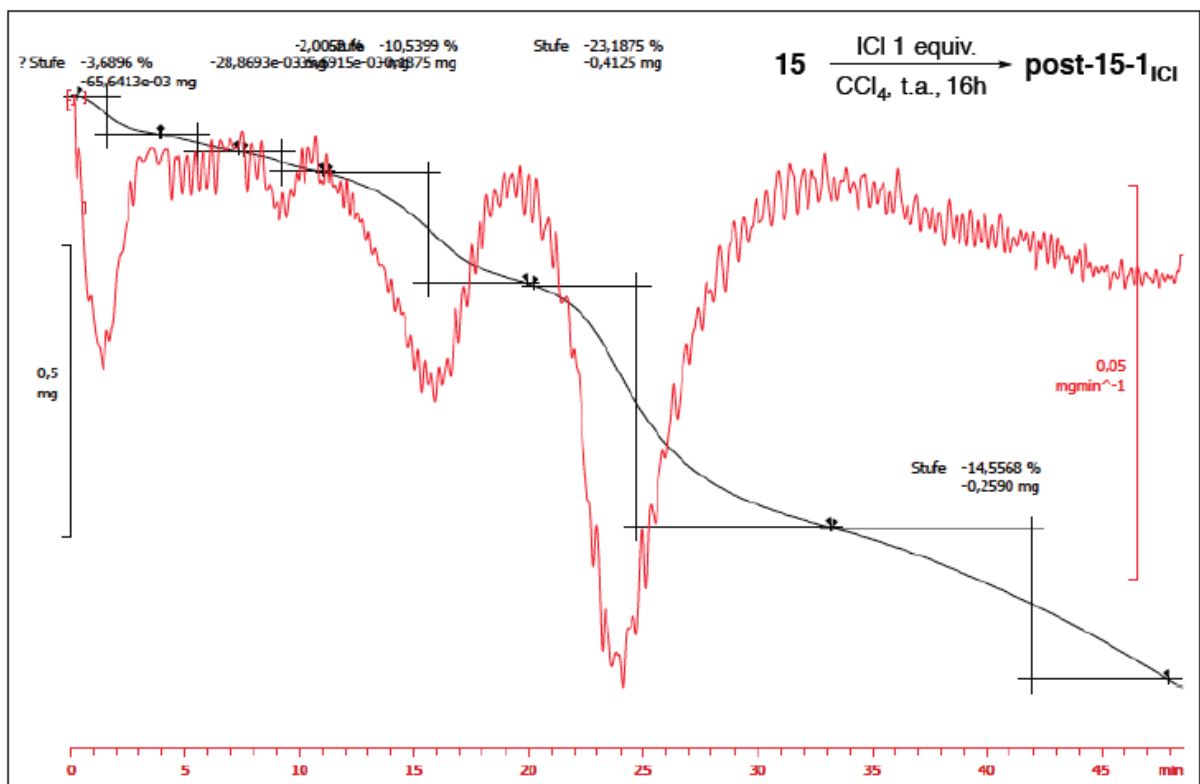

With 10 equiv. of ICl : TGA 18-10<sub>ICl</sub>

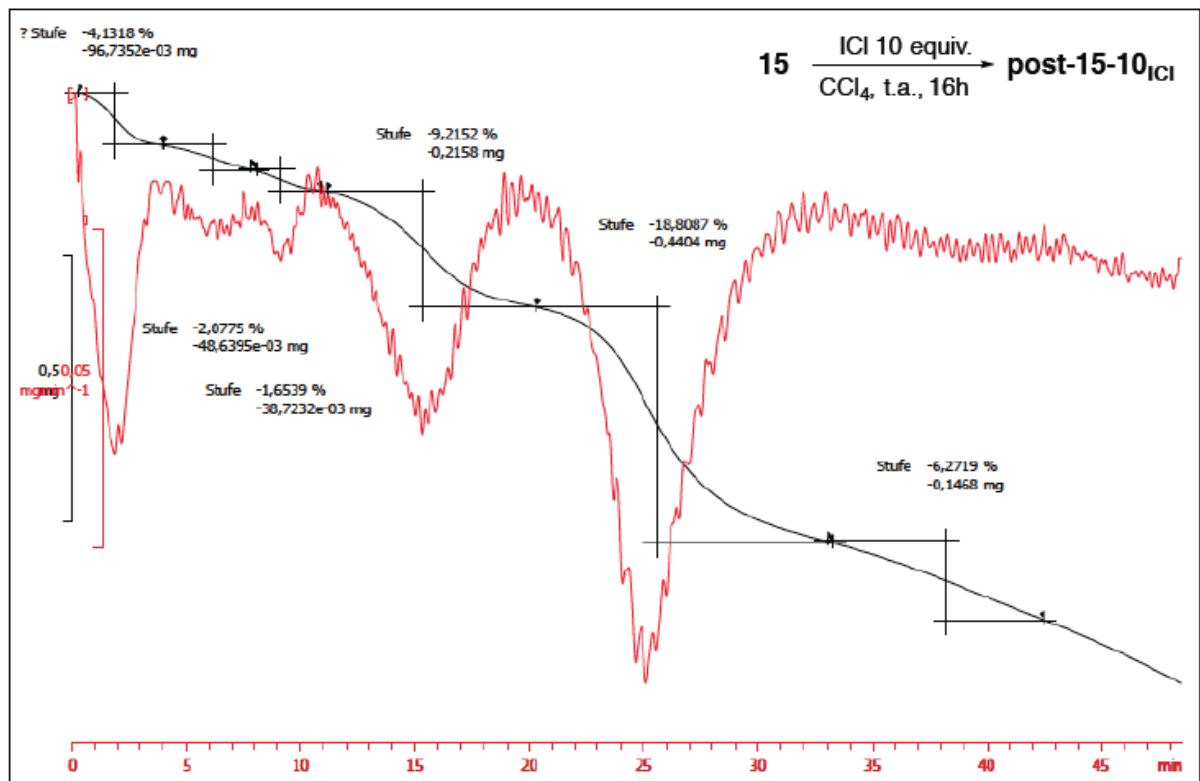

### Cleavage of 15 in presence of trifluoromethanesulfonic acid (route b)

With 1 equiv. of TfOH : TGA 18-1<sub>TfOH</sub>

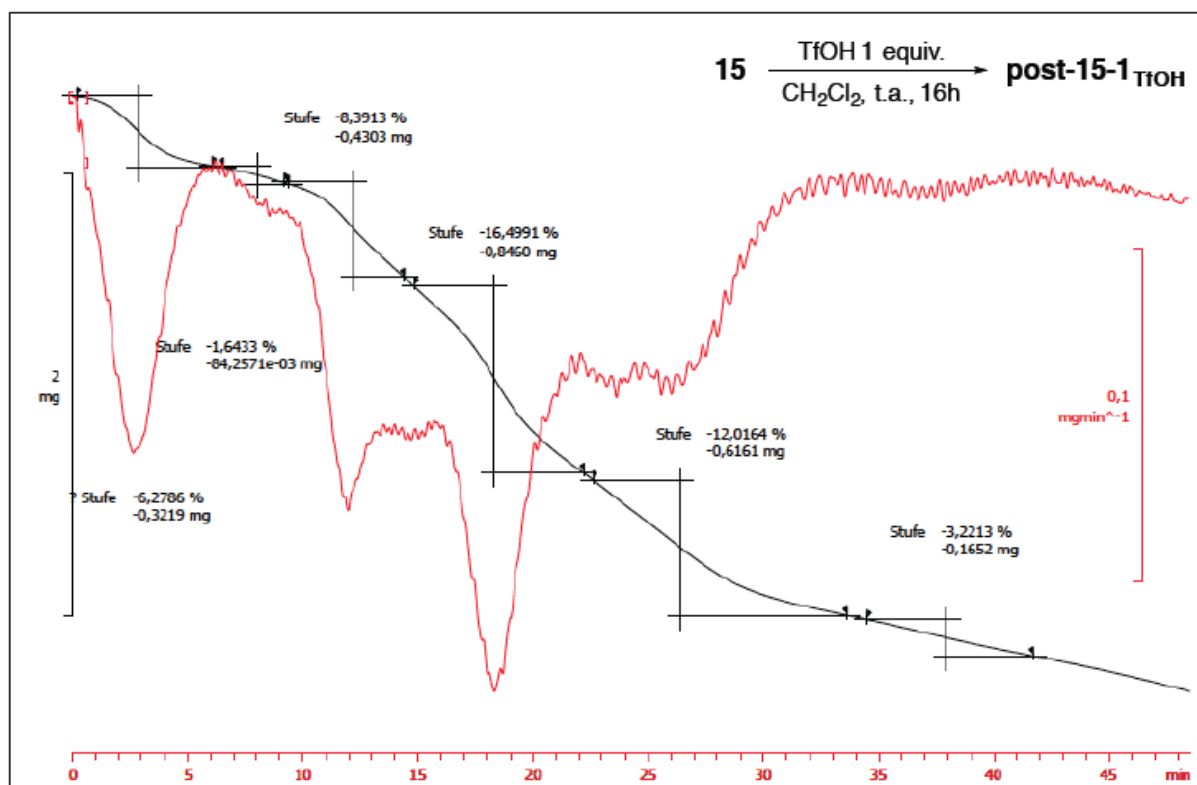

With 10 equiv. of TfOH : TGA 18-10<sub>TfOH</sub>

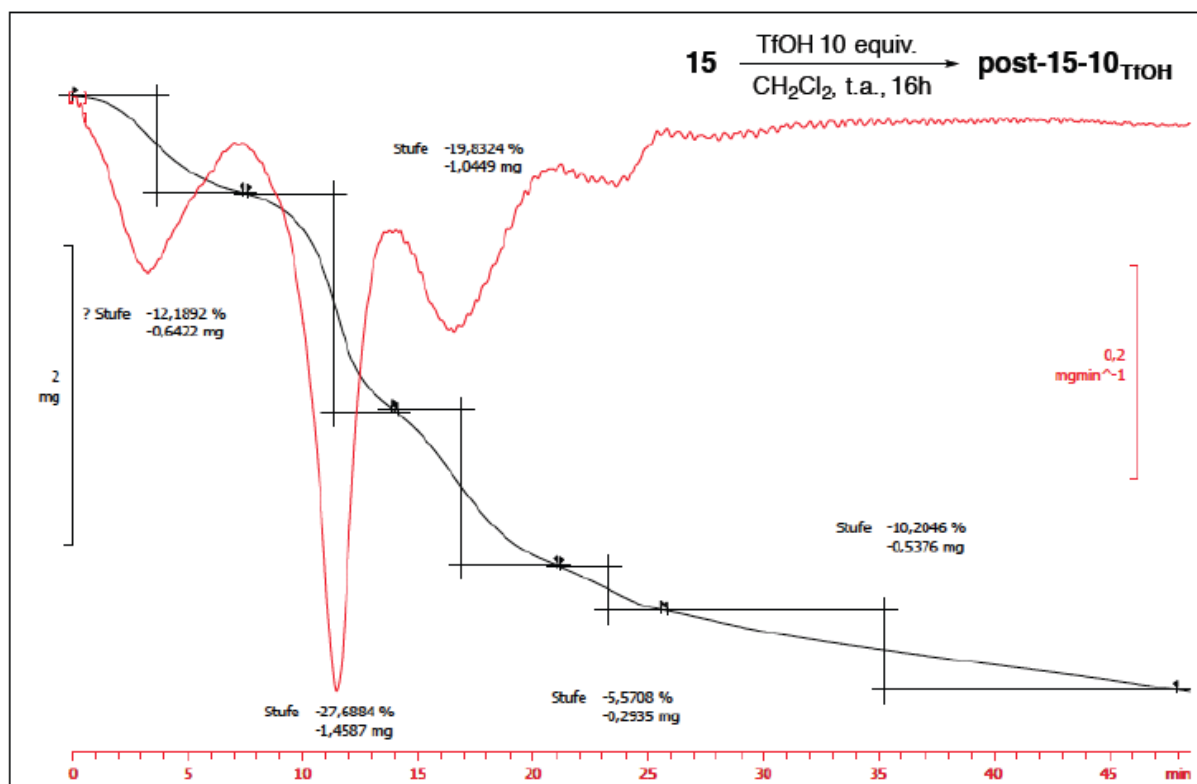

## Cleavage of 16 in presence of trifluoromethanesulfonic acid (route b)

With 1 equiv. of TfOH : TGA 19-1<sub>TfOH</sub>

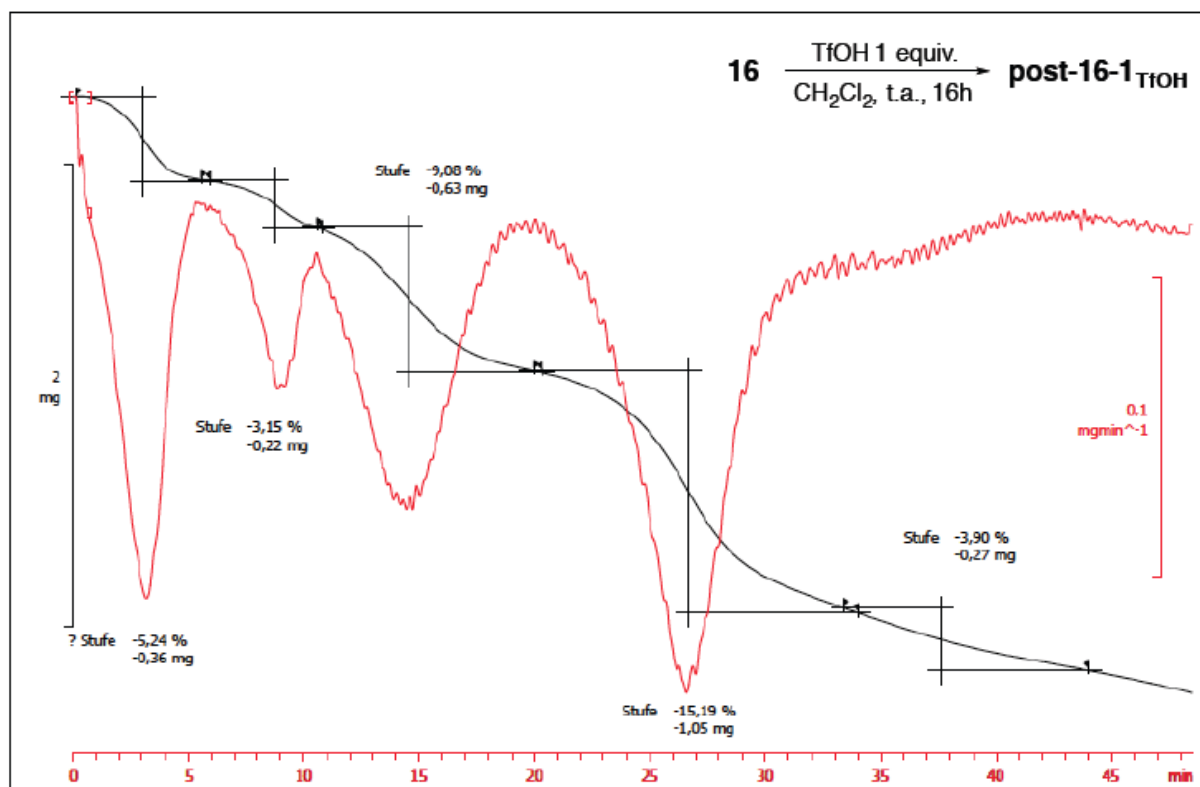

With 100 equiv. of TfOH : TGA 19-100<sub>TfOH</sub>

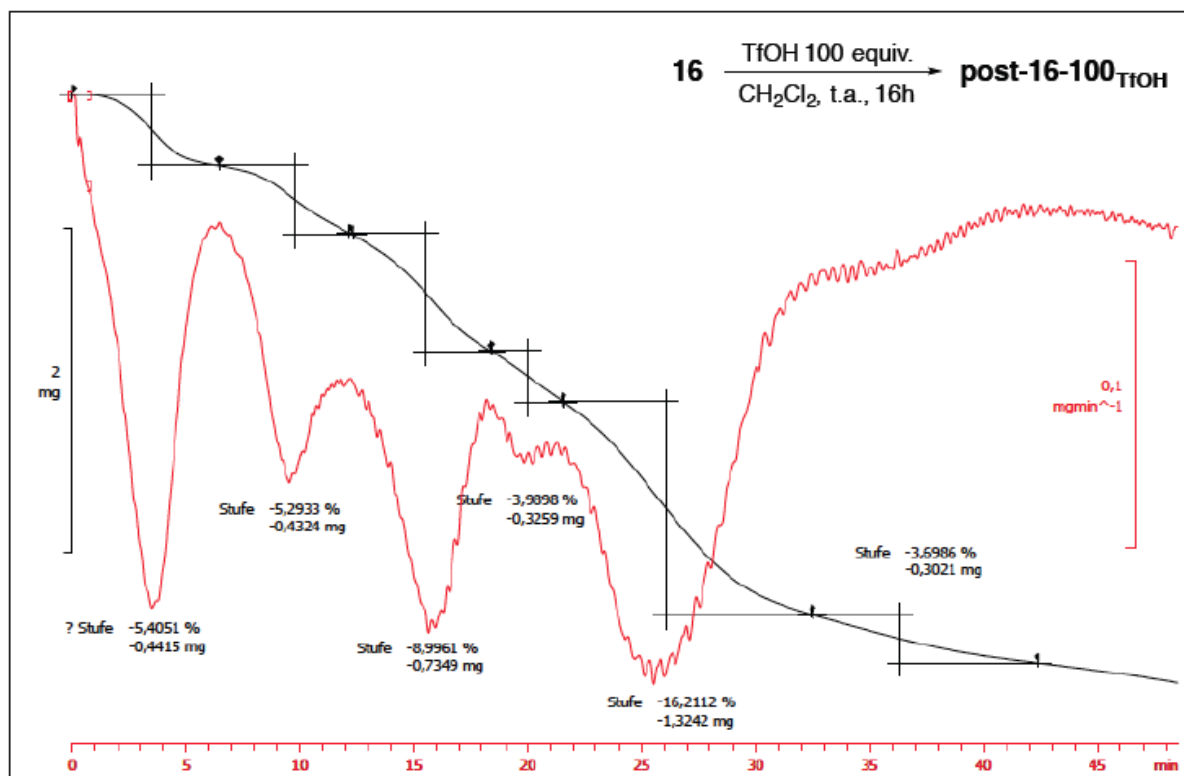

## VII - N<sub>2</sub> adsorption data of POPs 9-19

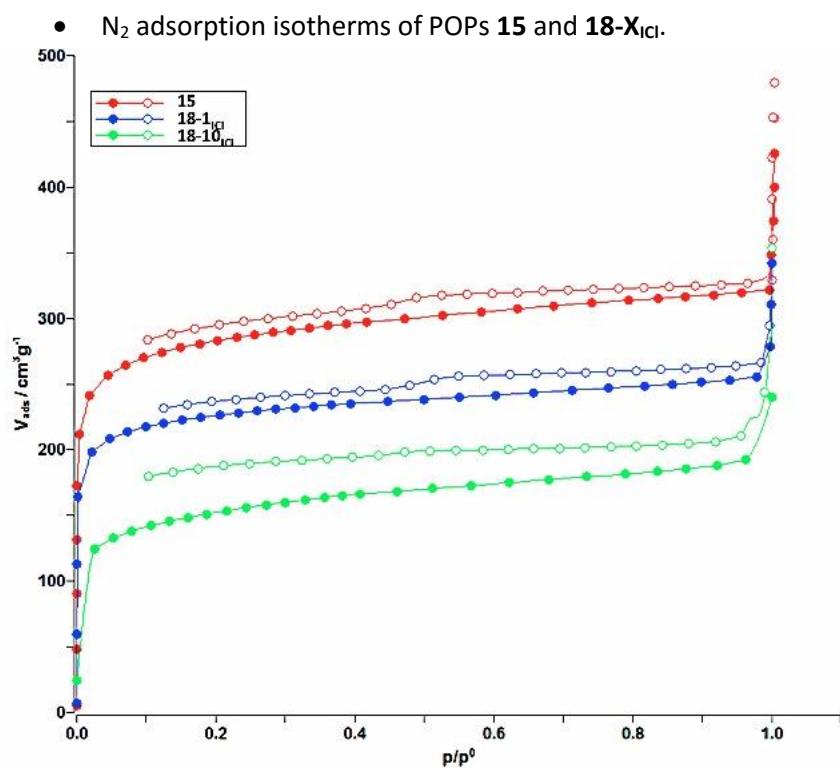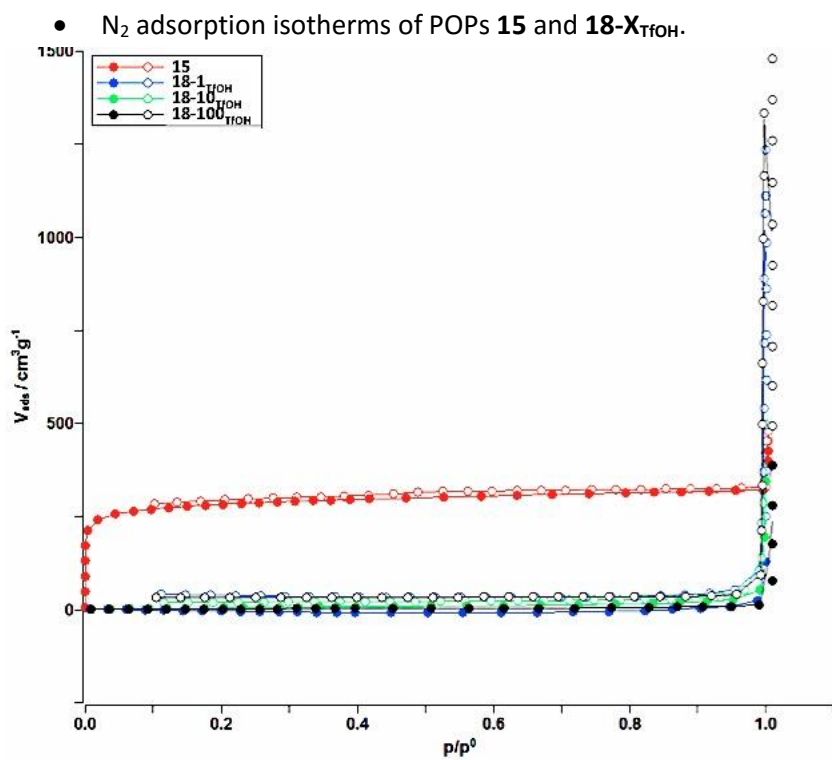



- N<sub>2</sub> adsorption isotherms of POPs **16** and **19-X**<sub>TFOH</sub>.

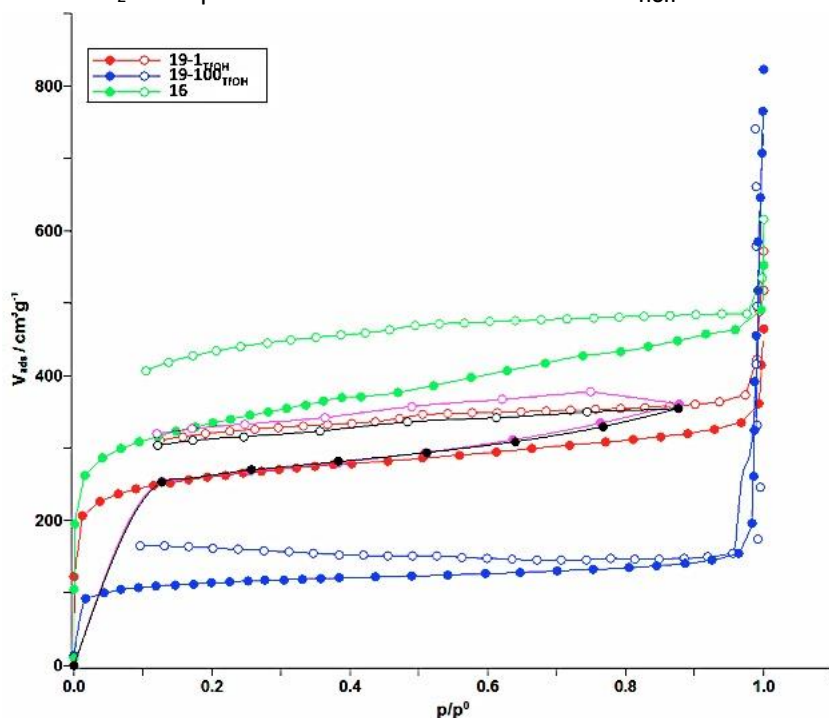

- Adsorption data of POPs **9-19**.

| Entry | POP                           | Specific Surface Area <sup>[a]</sup> |          | Total Pore volume <sup>[b]</sup> | Maximum diameter <sup>[c]</sup> | Average diameter <sup>[c]</sup> |
|-------|-------------------------------|--------------------------------------|----------|----------------------------------|---------------------------------|---------------------------------|
|       |                               | BET                                  | Langmuir |                                  |                                 |                                 |
| 1     | <b>10</b>                     | 231                                  | 351      | 0.0975                           | 1.10                            | 0.93                            |
| 2     | <b>12</b>                     | 123                                  | 198      | 0.0455                           | 1.10                            | 0.99                            |
| 3     | <b>14</b>                     | 134                                  | 268      | 0.0365                           | 1.57                            | 1.09                            |
| 4     | <b>15</b>                     | 881                                  | 1301     | 0.4293                           | 0.59                            | 0.48                            |
| 5     | <b>16</b>                     | 1056                                 | 1570     | 0.4903                           | 0.62                            | 0.44                            |
| 6     | <b>17</b>                     | 1080                                 | 1614     | 0.5001                           | 0.69                            | 0.44                            |
| 7     | <b>18-1</b> <sub>Cl</sub>     | 696                                  | 1034     | 0.3410                           | 0.48                            | 0.01                            |
| 8     | <b>18-10</b> <sub>Cl</sub>    | 487                                  | 731      | 0.2250                           | 1.21                            | 0.94                            |
| 9     | <b>18-1</b> <sub>TFOH</sub>   | 3                                    | 5        | 0.0023                           | /                               | /                               |
| 10    | <b>18-10</b> <sub>TFOH</sub>  | 23                                   | 45       | 0.0065                           | /                               | /                               |
| 11    | <b>18-100</b> <sub>TFOH</sub> | 9                                    | 16       | 0.0030                           | /                               | /                               |
| 12    | <b>19-1</b> <sub>TFOH</sub>   | 815                                  | 1227     | 0.3901                           | 0.58                            | 0.59                            |
| 13    | <b>19-100</b> <sub>TFOH</sub> | 361                                  | 532      | 0.1719                           | 1.03                            | 0.88                            |

<sup>[a]</sup> Surface area calculated over the relative pressure range  $P/P_0 = 0.05-0.3$ . Specific surface area is expressed in  $\text{m}^2 \cdot \text{g}^{-1}$ . <sup>[b]</sup> Total pore volume for  $P/P_0 = 0.99$  and is expressed in  $\text{cm}^3 \cdot \text{g}^{-1}$ . <sup>[c]</sup> The Saito and Foley method was applied for calculation of the pore characteristics. Maximum and average diameters of pore are expressed in nm.

- Pore size distribution of POPs 10-16, 18 and 19.

Pore size distribution of POP 10

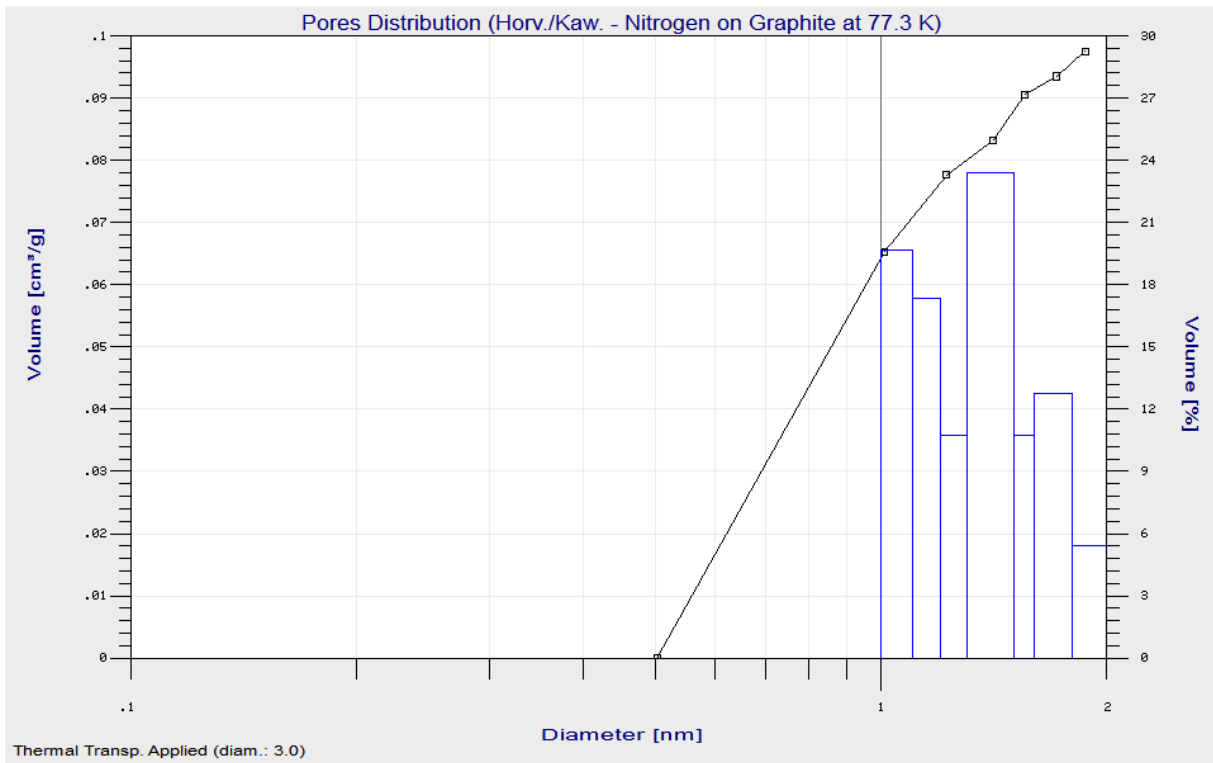

Pore size distribution of POP 12

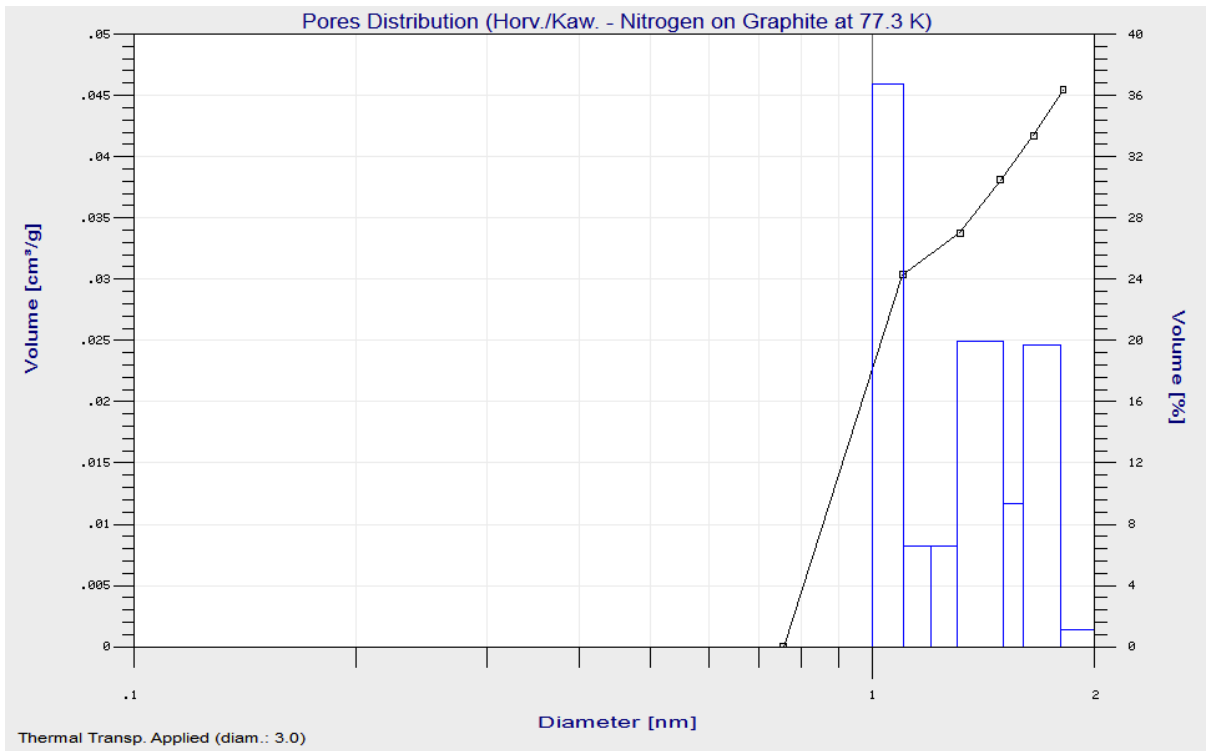

Pore size distribution of POP 14

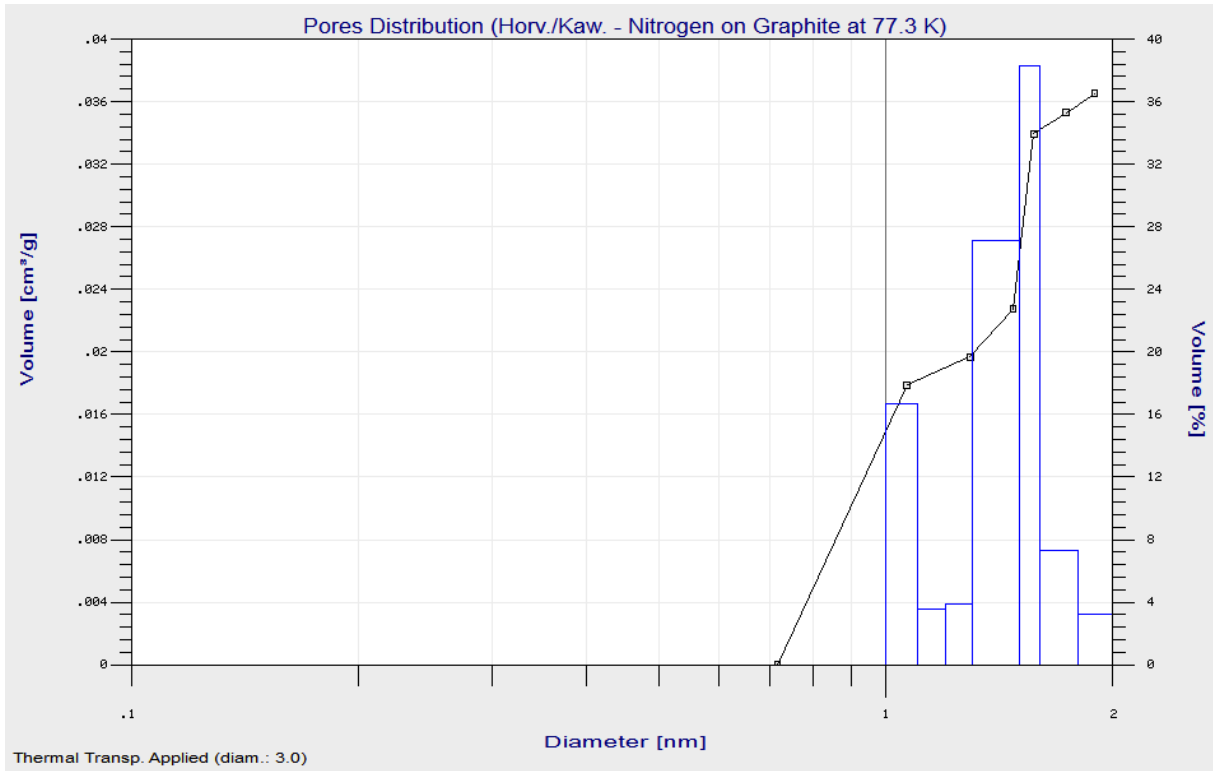

Pore size distribution of 15

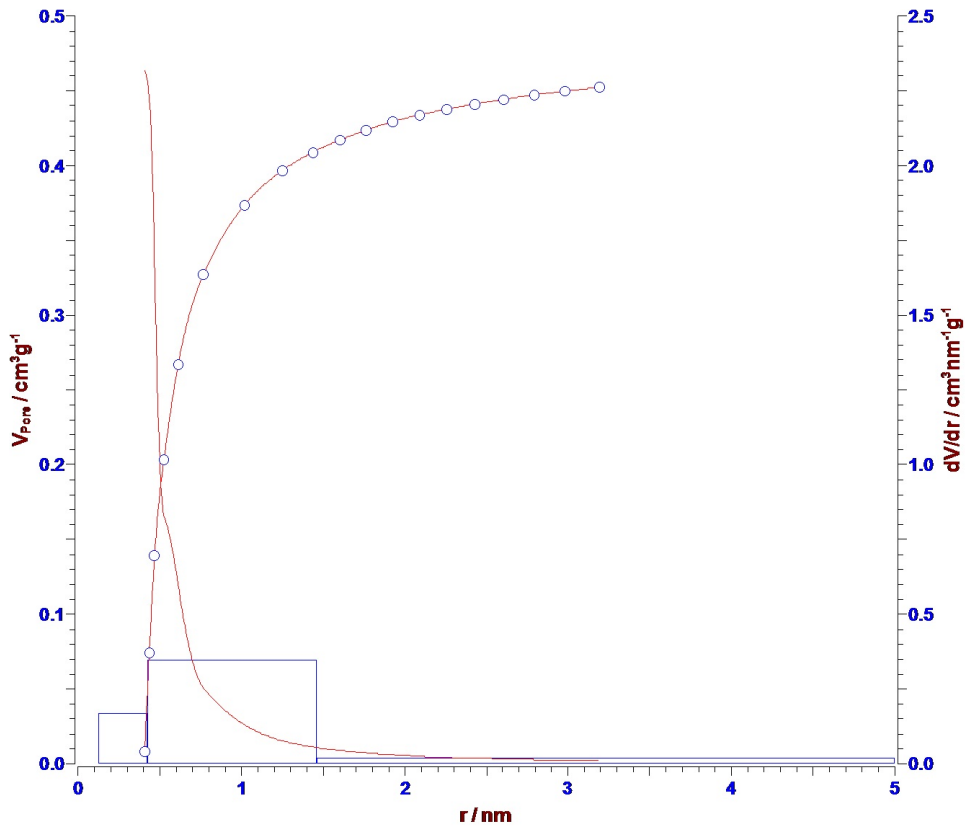

Pore size distribution of 16

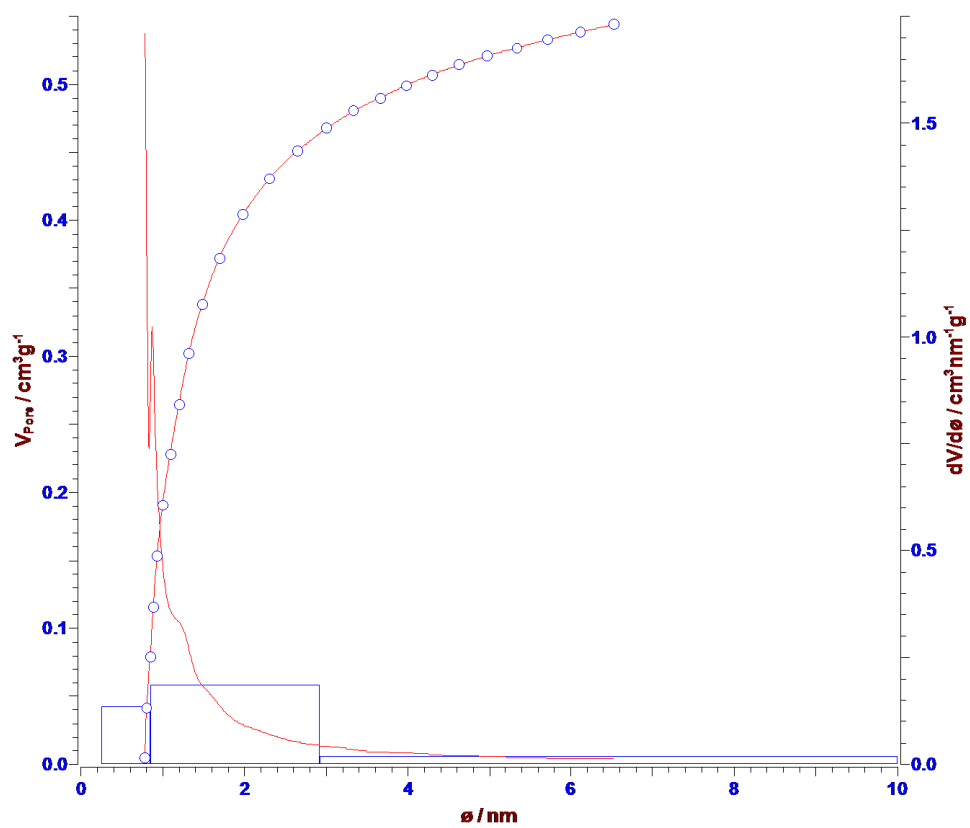

Pore size distribution of 17

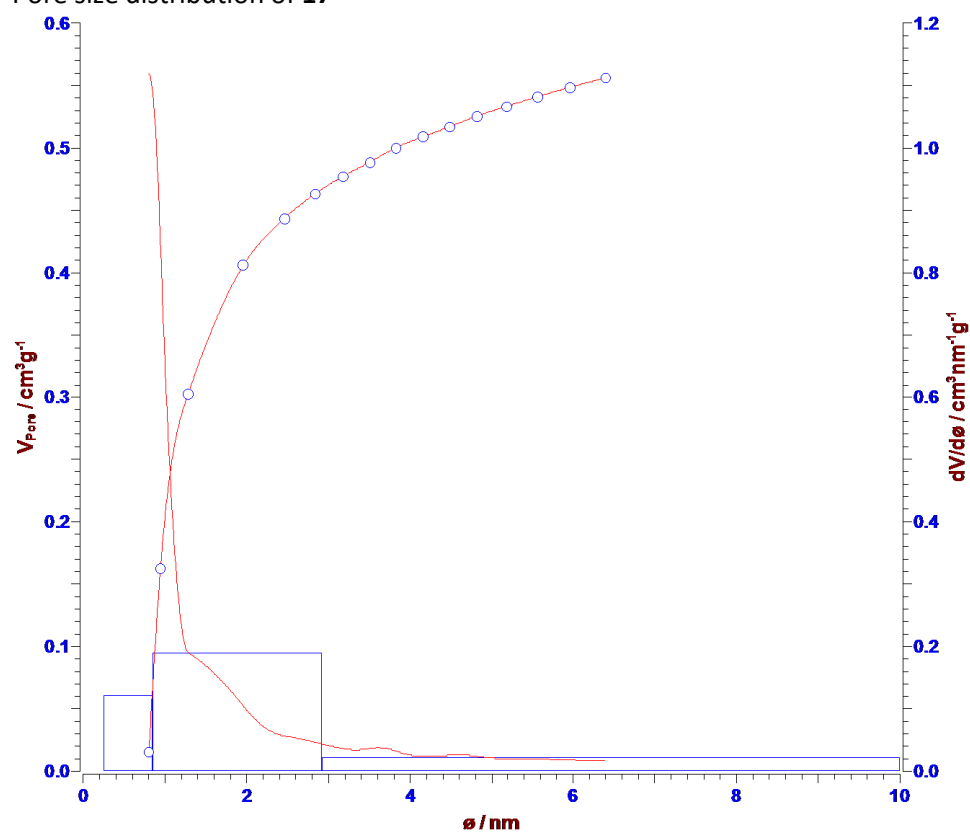

Pore size distribution of **18-1<sub>Cl</sub>**

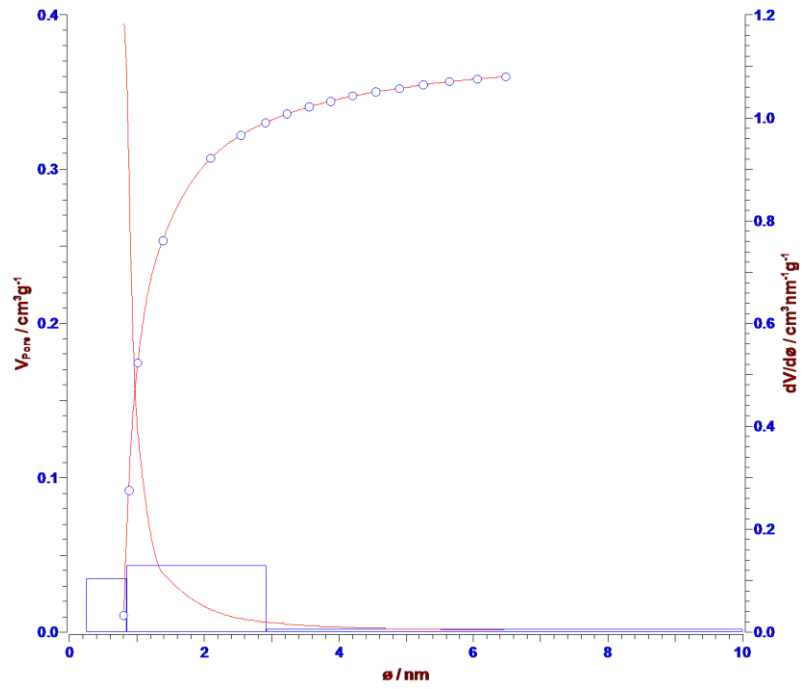

Pore size distribution of **18-10<sub>Cl</sub>**

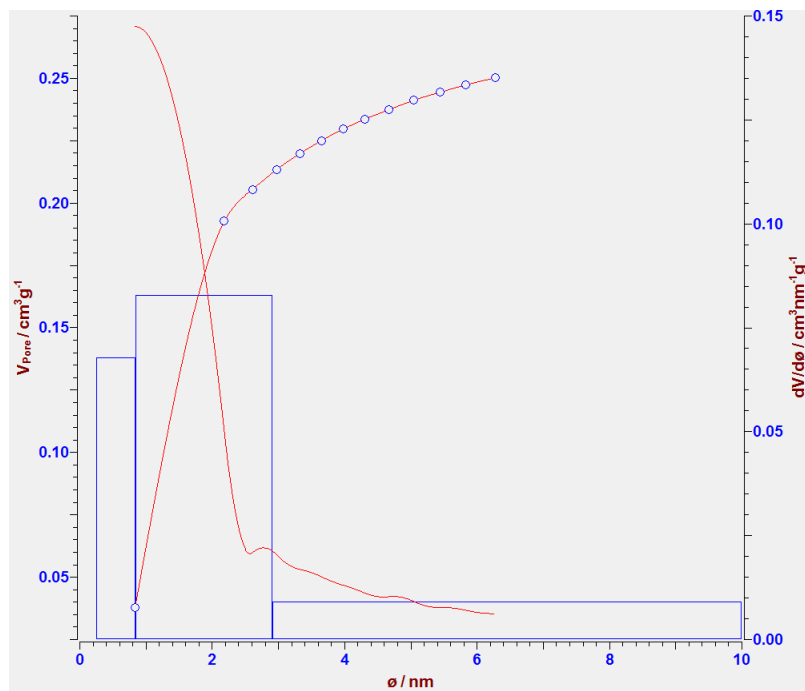

Pore size distribution of 18-10<sub>TFOH</sub>

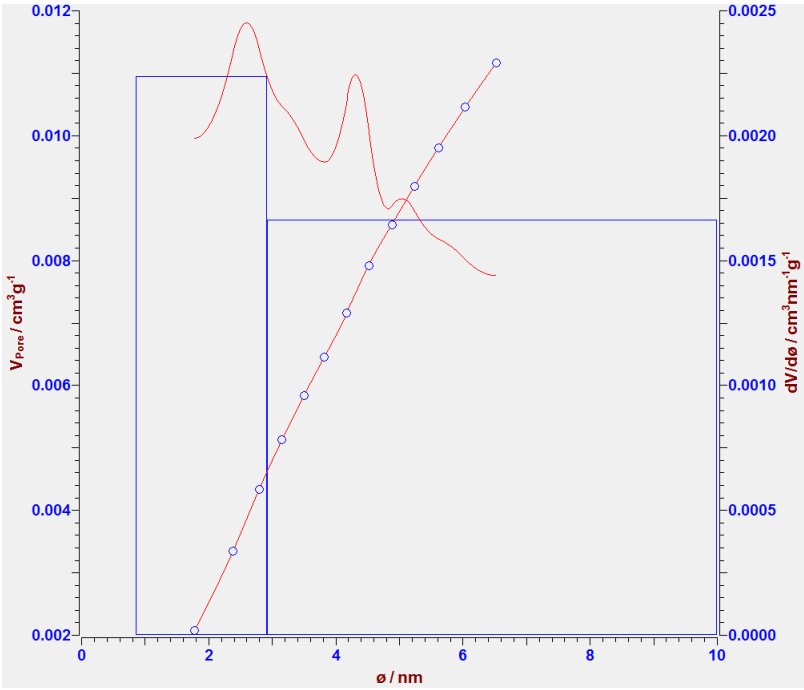

Pore size distribution of 18-100<sub>TFOH</sub>

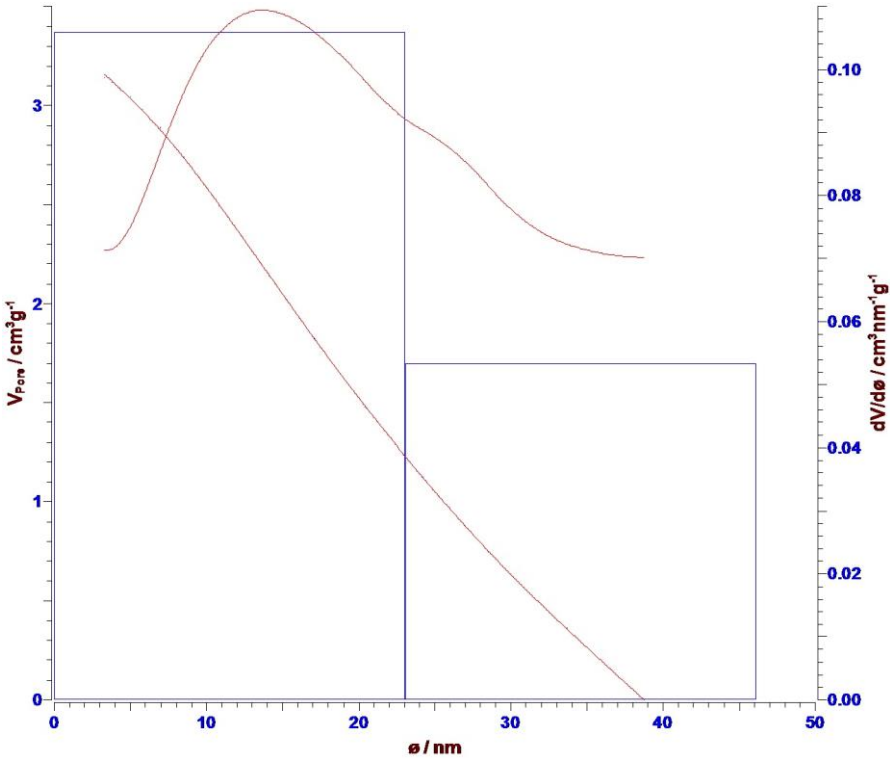

Pore size distribution of **19-1**<sub>TfOH</sub>

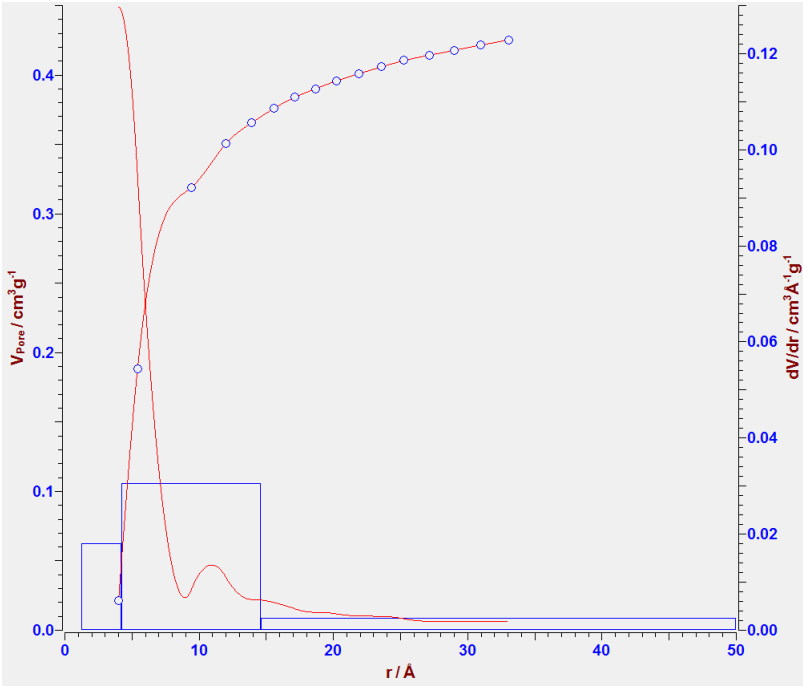

Pore size distribution of **19-100**<sub>TfOH</sub>

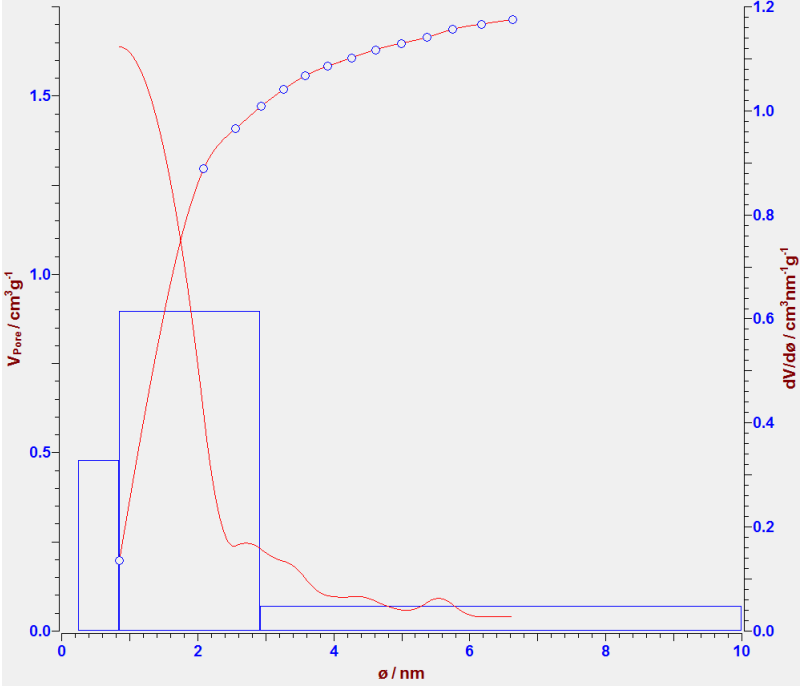

## VIII - SEM pictures of POP 15

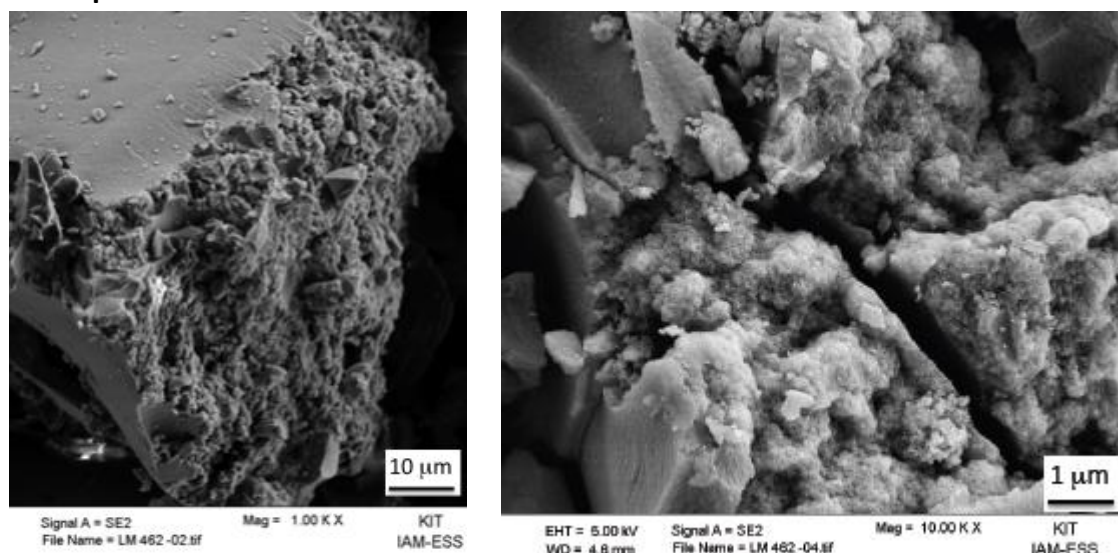

## IX - References

- [1] J. B. Lambert, L. Zhongqiang, L. Chunqing, *Organometallics* **2008**, *27*, 1464-1469.
- [2] W. Lu, D. Yuan, D. Zhao, I. C. Schiling, O. Plietzsch, T. Muller, S. Bräse, J. Guenther, J. Blümel, R. Krishna, Z. Li, H.-C. Zhou, *Chem. Mater.* **2010**, *22*, 5964-5972.
- [3] K. T. Hattori, T. Hattori, S. Uchino, T. Ueno, N. Hayashi, S. Shirai, N. Moriuchi, M. Morita, *Jpn. J. Appl. Phys.* **1992**, *31*, 4307-4311.
- [4] P. R. Serwinski, R. Walton, J. A. Sanborn, P. M. Lahti, E. Tomonori, D. Miura, H. Tomioka, A. Nicolaidis, *Org. Lett.* **2011**, *3*, 357-360.
- [5] O. Plietzsch, I. C. Schiling, M. Tolev, M. Nieger, C. Richert, T. Muller, S. Bräse, *Org. Biomol. Chem.* **2009**, *7*, 4734-4743.
- [6] S. N. Bhattachariya, P. Raj, R. C. Srivastava, *J. Organomet. Chem.* **1976**, *105*, 45-49.
- [7] S. Konieczny, S. J. Jacobs, J. K. Braddock Wilking, P. P. Gaspar, *J. Organomet. Chem.* **1988**, *341*, C17-C22.
- [8] K. V. Zaitsev, A. A. Kapranov, Y. F. Oprunenko, A. V. Churakov, J. A. K. Howard, B. N. Tarasevich, S. S. Karlov, G. S. Zaitseva, *J. Organomet. Chem.* **2012**, *700*, 207-213.
